# Supplementary material for: Implementing Riverine Biogeochemical Inputs in ECCO-Darwin: a Critical Step Forward for a Pioneering Data-Assimilative Global-Ocean Biogeochemistry Model
Source: Copernicus journal article supplement (doi:10.5194/egusphere-2025-1707), 2025-06-02
Supplement: Supplementary file 1 [file savellietalSI.pdf › savellietalSI.pdf]

# Implementing Riverine Biogeochemical Inputs in ECCO-Darwin: A Sensitivity Analysis of Terrestrial Fluxes in a Data-Assimilative Global Ocean Biogeochemistry Model

Raphaël Savelli<sup>1,2</sup>, Dustin Carroll<sup>1,2</sup>, Dimitris Menemenlis<sup>2</sup>, Jonathan Lauderdale<sup>3,4</sup>, Clément Bertin<sup>2</sup>, Stephanie Dutkiewicz<sup>3,4</sup>, Manfredi Manizza<sup>5,6</sup>, Anthony Bloom<sup>2</sup>, Karel Castro-Morales<sup>7</sup>, Charles E. Miller<sup>2</sup>, Marc Simard<sup>2</sup>, Kevin W. Bowman<sup>2</sup>, and Hong Zhang<sup>2</sup>

<sup>1</sup>Moss Landing Marine Laboratories, San José State University, Moss Landing, CA, USA

<sup>2</sup>Jet Propulsion Laboratory, California Institute of Technology, Pasadena, CA, USA

<sup>3</sup>Department of Earth, Atmospheric and Planetary Sciences, Massachusetts Institute of Technology, Cambridge, Massachusetts, USA

<sup>4</sup>Center for Global Change Science, Massachusetts Institute of Technology, Cambridge, Massachusetts, USA

<sup>5</sup>Geosciences Research Division, Scripps Institution of Oceanography, University of California - San Diego, La Jolla, CA, USA

<sup>6</sup>National Institute of Oceanography and Applied Geophysics - OGS, Sgonico, Italy

<sup>7</sup>Deutscher Wetterdienst, Climate and Environment, Offenbach, Germany

**Correspondence:** Raphaël Savelli (raphael.savelli@sjsu.edu)

## Supporting Information

### Text S1: Additional River Inputs Evaluation

**Table S1.** Arctic rivers inputs in the present study and from the ArcticGRO monitoring network (Holmes et al., 2012; Tank et al., 2023).

|                  | $t_{ALK}$                |           | $t_{DOC}$                |           | $t_{DIN}$                |           | $t_{DSi}$                 |           |
|------------------|--------------------------|-----------|--------------------------|-----------|--------------------------|-----------|---------------------------|-----------|
|                  | (Tg C yr <sup>-1</sup> ) |           | (Tg C yr <sup>-1</sup> ) |           | (Tg N yr <sup>-1</sup> ) |           | (Tg Si yr <sup>-1</sup> ) |           |
|                  | This study               | ArcticGRO | This study               | ArcticGRO | This study               | ArcticGRO | This study                | ArcticGRO |
| <b>Ob</b>        | 6.6                      | 4.1       | 2.6                      | 4.9       | 0.1                      | 0.1       | 1.3                       | 1.9       |
| <b>Yenisey</b>   | 6.7                      | 5         | 3                        | 5         | 0.1                      | 0.05      | 1                         | 2.1       |
| <b>Mackenzie</b> | 3.9                      | 3.7       | 1.8                      | 1.6       | 0.03                     | 0.02      | 0.7                       | 0.5       |
| <b>Lena</b>      | 8                        | 6.5       | 2.4                      | 9.8       | 0.1                      | 0.08      | 1                         | 2.5       |
| <b>Kolyma</b>    | 0.07                     | 0.4       | 0.6                      | 1.1       | 0.01                     | 0.01      | 0.2                       | 0.3       |
| <b>Yukon</b>     | 0.9                      | 2.6       | 0.4                      | 2.3       | 0.01                     | 0.03      | 0.3                       | 0.8       |

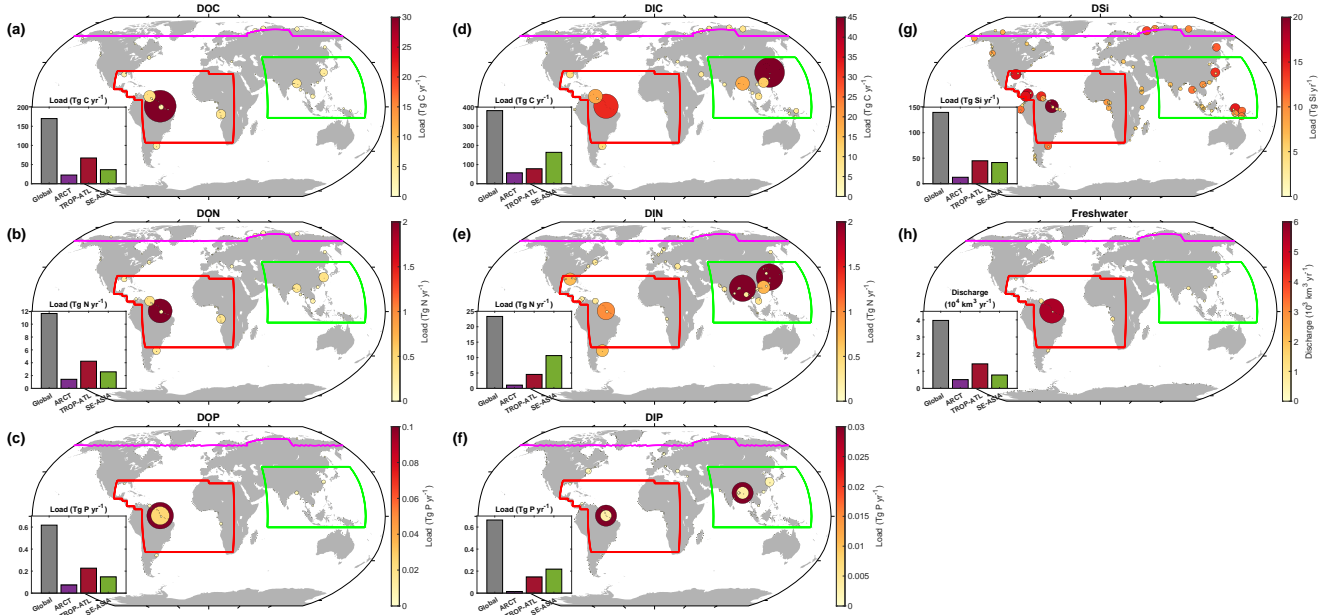

**Figure S1.** Riverine freshwater discharge and biogeochemical inputs resulting from the association of Global NEWS 2 and JRA55-do on the LLC90 grid. Domain-scale freshwater discharge and load are relative to the respective domain area. The insets show corresponding year-2000 discharge/load for various regions. The size of the circles represents the magnitude of loads. Colored boundary lines correspond to domains used for regional analysis of the Arctic Ocean (ARCT, violet line), the Tropical Atlantic (TROP-ATL, red line), and Southeast Asia (SE-ASIA, green line). The black line delineates the coastal ocean from the open ocean, which is set by the furthest point from the coastline of either a 300-km distance or the 1000-m isobath. Only rivers with annual discharge over  $10 \text{ km}^3 \text{ yr}^{-1}$  are shown.

## Text S2: Suggested Additional Land-to-Ocean Model Improvements

In this section, we elaborate on additional necessary model improvements to better quantify the role of inputs on air-sea  $\text{CO}_2$  fluxes and ocean biogeochemistry.

We note that we only considered surface-ocean freshwater discharge, which represents roughly  $39,000 \text{ km}^3 \text{ yr}^{-1}$  delivered to the ocean. However, a significant fraction of freshwater discharge to the ocean (10%) originates from groundwater discharge (Taniguchi et al., 2002). While the net impact on the open-ocean carbon cycle is small, this discharge volume and associated biogeochemical elements can substantially impact the coastal ocean through eutrophication (Luijendijk et al., 2020). In addition to groundwater discharge, subglacial discharge from marine-terminating glaciers, particularly in Greenland and the West Antarctic Peninsula, would need to be fluxed at subsurface depths and take subglacial plume entrainment into account (Carroll et al., 2016; Slater and Straneo, 2022). In addition to the physical impact of freshwater inputs on the ocean, subglacial upwelling of nutrients (Hopwood et al., 2018) and meltwater from ice sheets and icebergs (Hopwood et al., 2020) is a significant source of reactive iron that can support coastal high-latitude marine ecosystems (Hawkins et al., 2014; Hopwood et al., 2020).

15 While their present contribution to global-ocean carbon cycling remains unknown, groundwater and subglacial discharge are expected to be altered by climate change (changes in storm and cyclone frequency and intensity, rising land and ocean temperatures, increased cryosphere melt, changes in ocean chemistry and coastal erosion) and human activities such as groundwater extraction (Richardson et al., 2024).

Moreover, heat from river discharge is omitted in our simulations. In the Arctic Ocean, where sea-ice cover is negatively  
20 correlated with heat from river discharge, the addition of point-source freshwater discharge should be supplemented with realistic water temperature to accurately represent sea-ice dynamics in response to riverine heat fluxes (Manak and Mysak, 1989; Whitefield et al., 2015; Park et al., 2020; Dong et al., 2022). Additionally, chromophoric dissolved organic matter (CDOM) absorbs heat and thus can increase thermal stratification near the surface ocean (Morris et al., 1995; Laurion et al., 1997; Caplanne and Laurion, 2008). In the Chukchi Sea, Hill (2008) associated the 40%-increase of energy absorption by the  
25 mixed layer in spring to the presence of ice algae. The heat absorption by dissolved organic matter may cause an amplification of Arctic Ocean warming if the delivered amount of terrestrial material and DOC increases in the future.

Finally, we scale the annual carbon or nutrient concentration from Global NEWS 2 with daily freshwater fluxes from JRA55-do to obtain time-varying, point-source inputs. Consequently, the seasonal cycle of biogeochemical fluxes tracks the seasonality of freshwater discharge in JRA55-do — which is a simplified first-order approximation. First, we acknowledge that the JRA55-  
30 do seasonal cycle of freshwater discharge can be inaccurate in specific regions (e.g., Arctic regions), and we also assume a direct relationship between carbon/nutrient concentrations and freshwater discharge (Suzuki et al., 2018; Tsujino et al., 2018; Feng et al., 2021). Second, we compute carbon/nutrient concentrations based on annual inputs from Global NEWS 2 and assume these values are constant throughout the year. Global observations have shown that the relationship between carbon/nutrient fluxes and freshwater discharge is not always valid, with concentrations changing on a sub-annual basis (Jordan et al., 1991;  
35 Le Fouest et al., 2013; Holmes et al., 2012; Bittar et al., 2016; Shogren et al., 2021; Kamjunke et al., 2021). Processes such as changes in land use, human inputs, sewage leaks, enhanced permafrost thaw, decomposition, or changes in basin hydrology can seasonally alter the concentration of biogeochemical substances without inducing changes in freshwater discharge — to account for these deficiencies, a land-surface model accounting for such processes, the Bayesian CARbon DAta-MODEl fraMework (CARDAMOM) (Bloom et al., 2020), is currently being coupled with ECCO-Darwin.

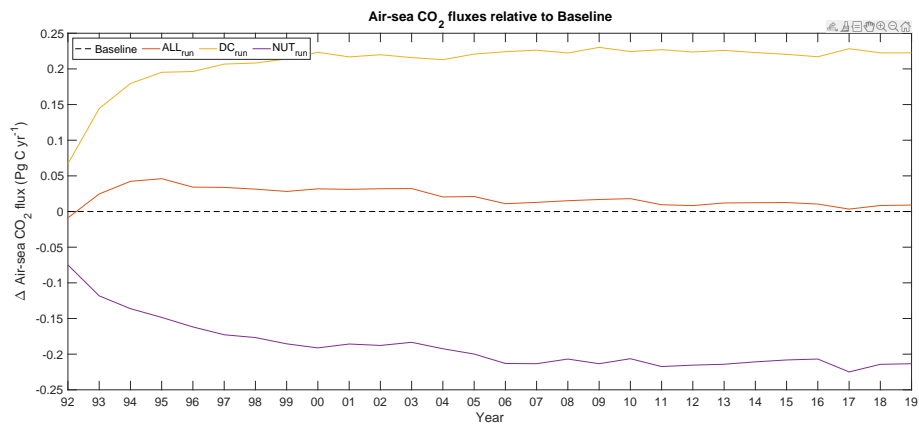

**Figure S2.** Globally integrated air-sea CO<sub>2</sub> flux time series relative to ECCO-Darwin Baseline. Air-sea CO<sub>2</sub> fluxes are annual means from January 1992 to December 2019. Positive values represent CO<sub>2</sub> outgassing; negative values represent uptake.

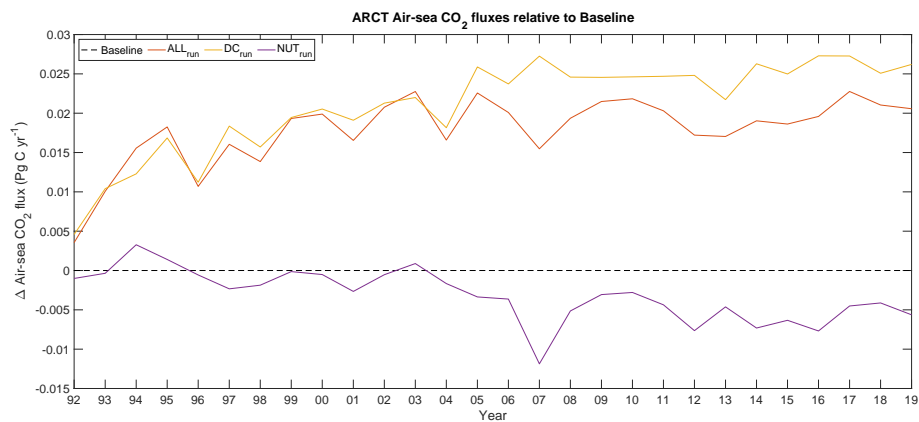

**Figure S3.** ARCT integrated air-sea CO<sub>2</sub> flux time series relative to ECCO-Darwin Baseline. Air-sea CO<sub>2</sub> fluxes are annual means from January 1992 to December 2019. Positive values represent CO<sub>2</sub> outgassing; negative values represent uptake.

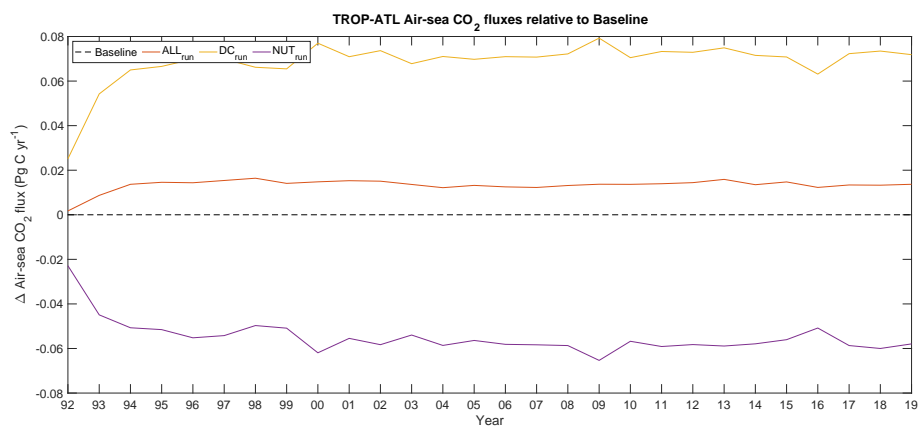

**Figure S4.** TROP-ATL integrated air-sea CO<sub>2</sub> flux time series relative to ECCO-Darwin Baseline. Air-sea CO<sub>2</sub> fluxes are annual means from January 1992 to December 2019. Positive values represent CO<sub>2</sub> outgassing; negative values represent uptake.

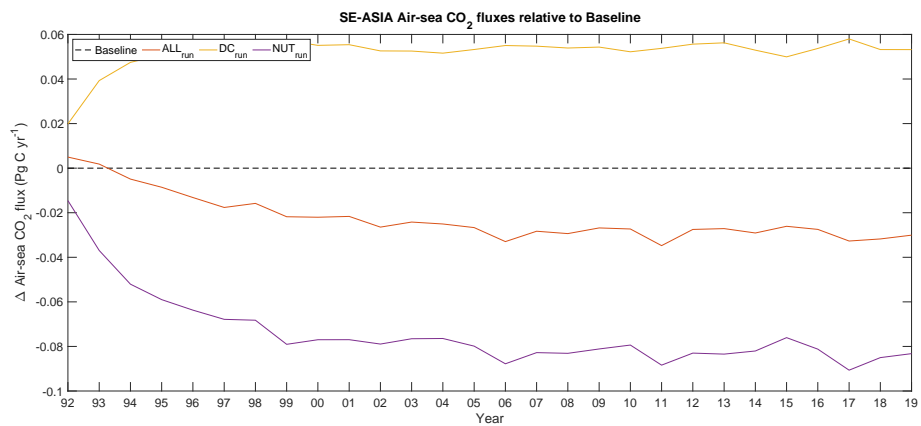

**Figure S5.** SE-ASIA integrated air-sea CO<sub>2</sub> flux time series relative to ECCO-Darwin Baseline. Air-sea CO<sub>2</sub> fluxes are annual means from January 1992 to December 2019. Positive values represent CO<sub>2</sub> outgassing; negative values represent uptake.

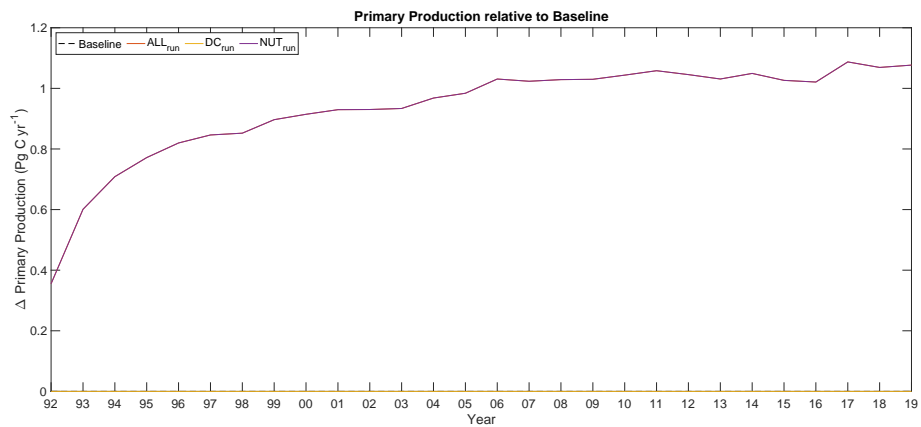

**Figure S6.** Globally integrated net primary production time series relative to ECCO-Darwin Baseline. Primary production is annual means from January 1992 to December 2019.

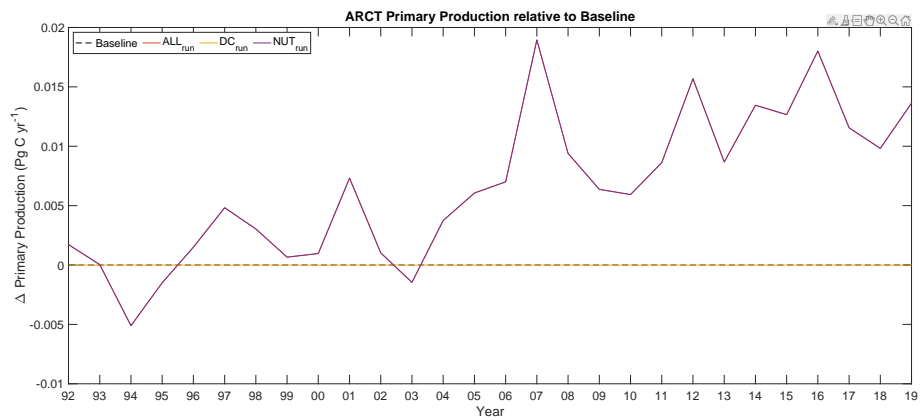

**Figure S7.** ARCT integrated net primary production time series relative to ECCO-Darwin Baseline. Primary production is annual means from January 1992 to December 2019.

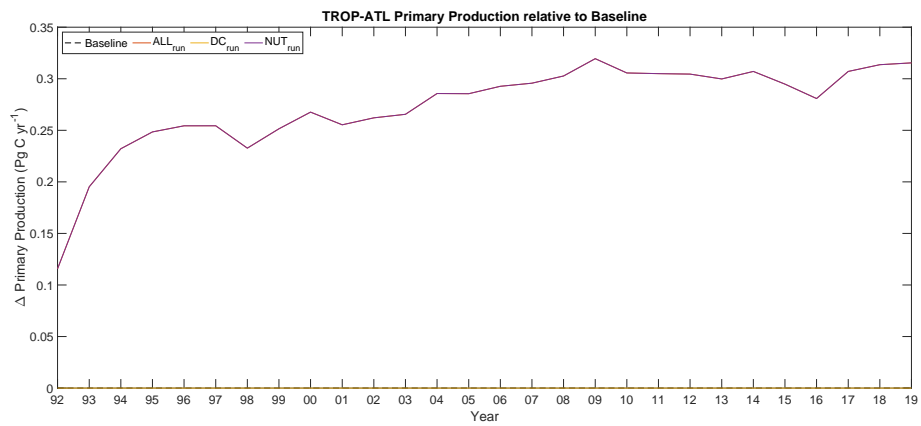

**Figure S8.** TROP-ATL integrated net primary production time series relative to ECCO-Darwin Baseline. Primary production is annual means from January 1992 to December 2019.

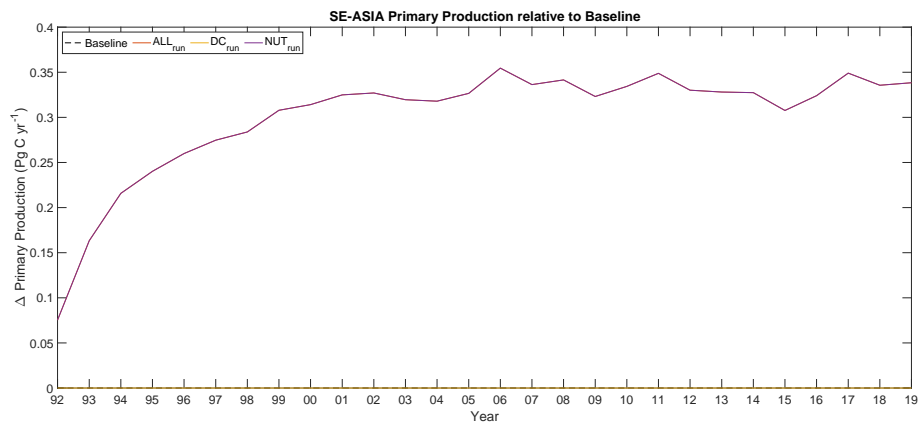

**Figure S9.** SE-ASIA integrated net primary production time series relative to ECCO-Darwin Baseline. Primary production is annual means from January 1992 to December 2019.

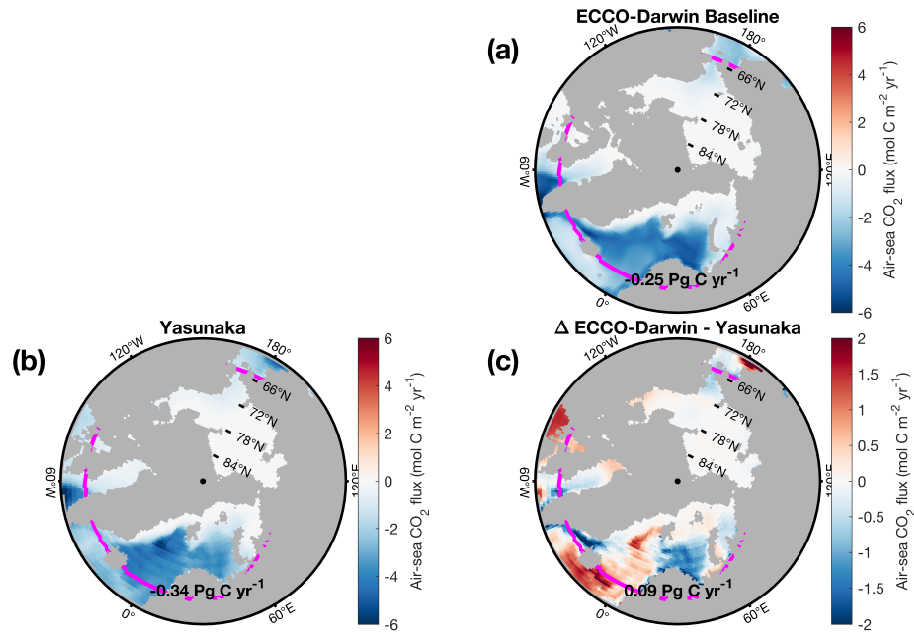

**Figure S10.** Climatological global-ocean air-sea CO<sub>2</sub> flux for (a) ECCO-Darwin Baseline and (b) Yasunaka data-based product (Yasunaka et al., 2023). Panel (c) corresponds to the difference between ECCO-Darwin Baseline and Yasunaka data-based product. Positive values represent CO<sub>2</sub> outgassing (red colors); negative values represent uptake (blue colors). All fields shown are time means from January 1997 to December 2014. Colored boundary lines correspond to the domain used for regional analysis of the Arctic Ocean (ARCT, violet line). The Yasunaka data-based product was interpolated on the LLC90 grid. Net air-sea CO<sub>2</sub> flux are integrated for the entire domain (Latitude > 60.5°).

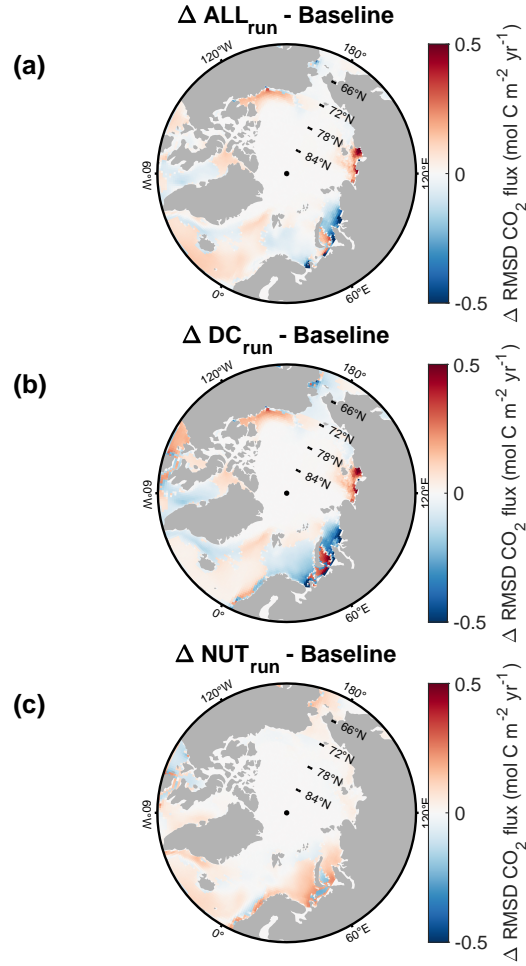

**Figure S11.** Change in root-mean-square deviation (RMSD) of air-sea  $\text{CO}_2$  flux between ECCO-Darwin Baseline and (a)  $\text{ALL}_{\text{run}}$ , (b)  $\text{DC}_{\text{run}}$ , and (c)  $\text{NUT}_{\text{run}}$  compared to the Yasunaka data-based product (Yasunaka et al., 2023). Positive values represent an increase of the deviation (red colors); negative values show a smaller deviation (blue colors). All fields shown are time means from January 1997 to December 2014.

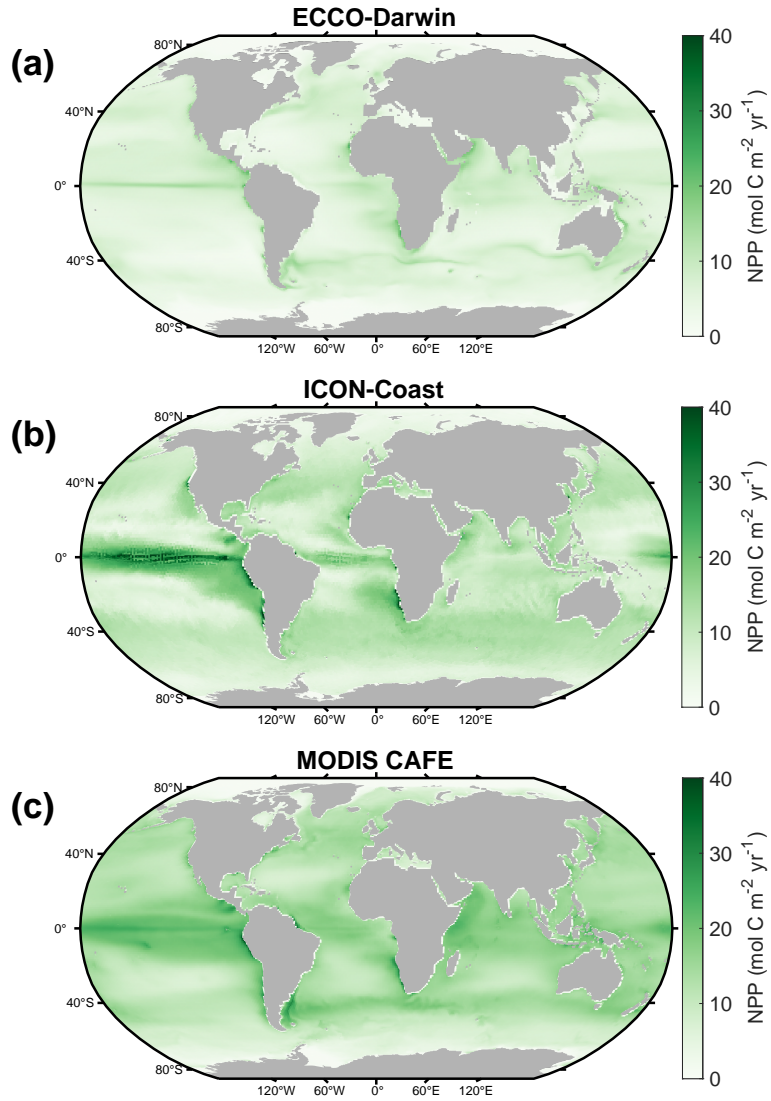

**Figure S12.** Climatological global NPP for (a) ECCO-Darwin Baseline, (b) ICON-Coast (Mathis et al., 2022), (c) MODIS CAFE algorithm (Silsbe et al., 2016). All fields shown are time means from January 2000 to December 2019. ICON-Coast and MODIS CAFE outputs were interpolated on the LLC90 grid.

## 40 References

- Bittar, T. B., Berger, S. A., Birsá, L. M., Walters, T. L., Thompson, M. E., Spencer, R. G., Mann, E. L., Stubbins, A., Frischer, M. E., and Brandes, J. A.: Seasonal dynamics of dissolved, particulate and microbial components of a tidal saltmarsh-dominated estuary under contrasting levels of freshwater discharge, *Estuarine, Coastal and Shelf Science*, 182, 72–85, <https://doi.org/https://doi.org/10.1016/j.ecss.2016.08.046>, 2016.
- 45 Bloom, A. A., Bowman, K. W., Liu, J., Konings, A. G., Worden, J. R., Parazoo, N. C., Meyer, V., Reager, J. T., Worden, H. M., Jiang, Z., et al.: Lagged effects regulate the inter-annual variability of the tropical carbon balance, *Biogeosciences*, 17, 6393–6422, 2020.
- Caplanne, S. and Laurion, I.: Effect of chromophoric dissolved organic matter on epilimnetic stratification in lakes, *Aquatic Sciences*, 70, 123–133, 2008.
- Carroll, D., Sutherland, D. A., Hudson, B., Moon, T., Catania, G. A., Shroyer, E. L., Nash, J. D., Bartholomäus, T. C., Felikson, D., Stearns, L. A., et al.: The impact of glacier geometry on meltwater plume structure and submarine melt in Greenland fjords, *Geophysical Research Letters*, 43, 9739–9748, 2016.
- 50 Dong, J., Shi, X., Gong, X., Astakhov, A. S., Hu, L., Liu, X., Yang, G., Wang, Y., Vasilenko, Y., Qiao, S., et al.: Enhanced Arctic sea ice melting controlled by larger heat discharge of mid-Holocene rivers, *Nature Communications*, 13, 5368, 2022.
- Feng, Y., Menemenlis, D., Xue, H., Zhang, H., Carroll, D., Du, Y., and Wu, H.: Improved representation of river runoff in Estimating the Circulation and Climate of the Ocean Version 4 (ECCOV4) simulations: implementation, evaluation, and impacts to coastal plume regions, *Geoscientific Model Development*, 14, 1801–1819, 2021.
- 55 Hawkins, J. R., Wadham, J. L., Tranter, M., Raiswell, R., Benning, L. G., Statham, P. J., Tedstone, A., Nienow, P., Lee, K., and Telling, J.: Ice sheets as a significant source of highly reactive nanoparticulate iron to the oceans, *Nature communications*, 5, 3929, 2014.
- Hill, V. J.: Impacts of chromophoric dissolved organic material on surface ocean heating in the Chukchi Sea, *Journal of Geophysical Research: Oceans*, 113, <https://doi.org/https://doi.org/10.1029/2007JC004119>, 2008.
- 60 Holmes, R. M., McClelland, J. W., Peterson, B. J., Tank, S. E., Bulygina, E., Eglinton, T. I., Gordeev, V. V., Gurtovaya, T. Y., Raymond, P. A., Repeta, D. J., et al.: Seasonal and annual fluxes of nutrients and organic matter from large rivers to the Arctic Ocean and surrounding seas, *Estuaries and Coasts*, 35, 369–382, 2012.
- Hopwood, M. J., Carroll, D., Browning, T. J., Meire, L., Mortensen, J., Krisch, S., and Achterberg, E. P.: Non-linear response of summertime marine productivity to increased meltwater discharge around Greenland, *Nature Communications*, 9, 3256, 2018.
- 65 Hopwood, M. J., Carroll, D., Dunse, T., Hodson, A., Holding, J. M., Iriarte, J. L., Ribeiro, S., Achterberg, E. P., Cantoni, C., Carlson, D. F., Chierici, M., Clarke, J. S., Cozzi, S., Fransson, A., Juul-Pedersen, T., Winding, M. H. S., and Meire, L.: Review article: How does glacier discharge affect marine biogeochemistry and primary production in the Arctic?, *The Cryosphere*, 14, 1347–1383, <https://doi.org/10.5194/tc-14-1347-2020>, 2020.
- 70 Jordan, T. E., Correll, D. L., Miklas, J. J., and Weller, D. E.: Long-term trends in estuarine nutrients and chlorophyll, and short-term effects of variation in watershed discharge, *Marine Ecology Progress Series*, 1991.
- Kamjunke, N., Rode, M., Baborowski, M., Kunz, J. V., Zehner, J., Borchardt, D., and Weitere, M.: High irradiation and low discharge promote the dominant role of phytoplankton in riverine nutrient dynamics, *Limnology and Oceanography*, 66, 2648–2660, <https://doi.org/https://doi.org/10.1002/lno.11778>, 2021.
- 75 Laurion, I., Vincent, W. F., and Lean, D. R.: Underwater ultraviolet radiation: development of spectral models for northern high latitude lakes, *Photochemistry and Photobiology*, 65, 107–114, 1997.

- Le Fouest, V., Babin, M., and Tremblay, J.-É.: The fate of riverine nutrients on Arctic shelves, *Biogeosciences*, 10, 3661–3677, 2013.
- Luijendijk, E., Gleeson, T., and Moosdorf, N.: Fresh groundwater discharge insignificant for the world’s oceans but important for coastal ecosystems, *Nature communications*, 11, 1260, 2020.
- 80 Manak, D. K. and Mysak, L. A.: On the relationship between arctic sea-ice anomalies and fluctuations in Northern Canadian air temperature and river discharge, *Atmosphere-Ocean*, 27, 682–691, 1989.
- Mathis, M., Logemann, K., Maerz, J., Lacroix, F., Hagemann, S., Chegini, F., Ramme, L., Ilyina, T., Korn, P., and Schrum, C.: Seamless integration of the coastal ocean in global marine carbon cycle modeling, *Journal of Advances in Modeling Earth Systems*, 14, e2021MS002789, 2022.
- 85 Morris, D. P., Zagarese, H., Williamson, C. E., Balseiro, E. G., Hargreaves, B. R., Modenutti, B., Moeller, R., and Queimalinos, C.: The attenuation of solar UV radiation in lakes and the role of dissolved organic carbon, *Limnology and Oceanography*, 40, 1381–1391, 1995.
- Park, H., Watanabe, E., Kim, Y., Polyakov, I., Oshima, K., Zhang, X., Kimball, J. S., and Yang, D.: Increasing riverine heat influx triggers Arctic sea ice decline and oceanic and atmospheric warming, *Science advances*, 6, eabc4699, 2020.
- Richardson, C., Davis, K., Ruiz-González, C., Guimond, J., Michael, H., Paldor, A., Moosdorf, N., and Paytan, A.: The impacts of climate change on coastal groundwater, *Nature Reviews Earth & Environment*, pp. 1–20, 2024.
- 90 Shogren, A. J., Zarnetske, J. P., Abbott, B. W., Iannucci, F., Medvedeff, A., Cairns, S., Duda, M. J., and Bowden, W. B.: Arctic concentration–discharge relationships for dissolved organic carbon and nitrate vary with landscape and season, *Limnology and Oceanography*, 66, S197–S215, <https://doi.org/https://doi.org/10.1002/lno.11682>, 2021.
- Silsbe, G. M., Behrenfeld, M. J., Halsey, K. H., Milligan, A. J., and Westberry, T. K.: The CAFE model: A net production model for global ocean phytoplankton, *Global Biogeochemical Cycles*, 30, 1756–1777, 2016.
- 95 Slater, D. and Straneo, F.: Submarine melting of glaciers in Greenland amplified by atmospheric warming, *Nature Geoscience*, 15, 794–799, 2022.
- Suzuki, T., Yamazaki, D., Tsujino, H., Komuro, Y., Nakano, H., and Urakawa, S.: A dataset of continental river discharge based on JRA-55 for use in a global ocean circulation model, *Journal of oceanography*, 74, 421–429, 2018.
- 100 Taniguchi, M., Burnett, W. C., Cable, J. E., and Turner, J. V.: Investigation of submarine groundwater discharge, *Hydrological Processes*, 16, 2115–2129, 2002.
- Tank, S. E., McClelland, J. W., Spencer, R. G., Shiklomanov, A. I., Suslova, A., Moatar, F., Amon, R. M., Cooper, L. W., Elias, G., Gordeev, V. V., et al.: Recent trends in the chemistry of major northern rivers signal widespread Arctic change, *Nature Geoscience*, 16, 789–796, 2023.
- 105 Tsujino, H., Urakawa, S., Nakano, H., Small, R. J., Kim, W. M., Yeager, S. G., Danabasoglu, G., Suzuki, T., Bamber, J. L., Bentsen, M., et al.: JRA-55 based surface dataset for driving ocean–sea-ice models (JRA55-do), *Ocean Modelling*, 130, 79–139, 2018.
- Whitefield, J., Winsor, P., McClelland, J., and Menemenlis, D.: A new river discharge and river temperature climatology data set for the pan-Arctic region, *Ocean Modelling*, 88, 1–15, 2015.
- Yasunaka, S., Manizza, M., Terhaar, J., Olsen, A., Yamaguchi, R., Landschützer, P., Watanabe, E., Carroll, D., Adiwira, H., Müller, J. D., and Hauck, J.: An Assessment of CO<sub>2</sub> Uptake in the Arctic Ocean From 1985 to 2018, *Global Biogeochemical Cycles*, 37, e2023GB007806, <https://doi.org/https://doi.org/10.1029/2023GB007806>, e2023GB007806 2023GB007806, 2023.
- 110
