# Supplementary material for: Implementing Riverine Biogeochemical Inputs in ECCO-Darwin: a Critical Step Forward for a Pioneering Data-Assimilative Global-Ocean Biogeochemistry Model
Source: Copernicus journal article supplement (doi:10.5194/egusphere-2025-1707), 2025-06-02
Supplement: Supplementary file 2 [file SI_document.pdf › SI_document.pdf]

# gcmfaces analysis of the solution for JRA55-DO daily runoff

August 1, 2023

# Table of contents

## Volume, Heat, And Salt Transports

- barotropic streamfunction
- meridional streamfunction
- meridional streamfunction (time series)
- meridional heat transport
- meridional seawater transport
- meridional salt transport
- meridional transports (time series)
- transects transport

## Mean And Variance Maps

- sea surface height
- 3D state variables
- air-sea heat flux
- air-sea freshwater flux

- surface wind stress

## Global, Zonal, Regional Averages

- zonal mean tendencies
- equatorial sections
- global mean properties
- zonal mean properties
- zonal mean properties (surface)
- seaice time series

## Mixed Layer Depth Fields

## Seaice And Snow Fields

- Monthly Thickness Distribution
- Northern Hem. in March
- Northern Hem. in September
- Southern Hem. in March
- Southern Hem. in September

# barotropic streamfunction

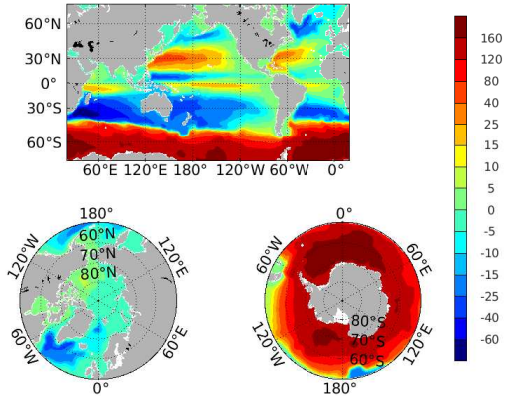

Figure : 1992-2019 mean – barotropic streamfunction (Sv)

# barotropic streamfunction

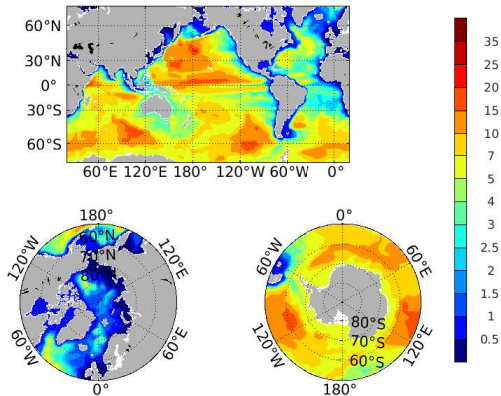

Figure : 1992-2019 standard deviation – barotropic streamfunction (Sv)

# meridional streamfunction

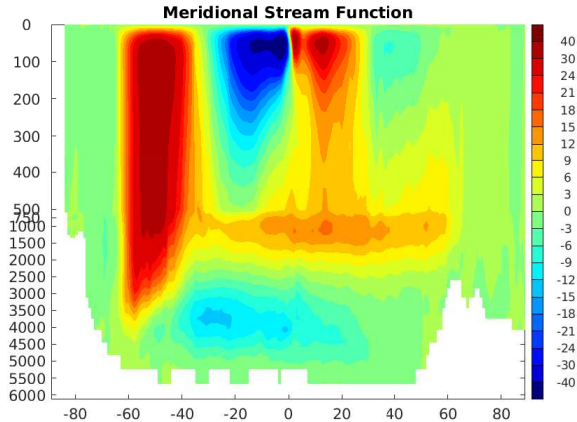

Figure : 1992-2019 mean – overturning streamfunction (Sv)

# meridional streamfunction

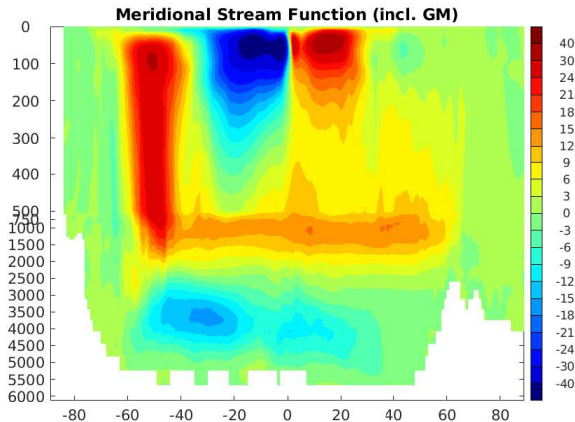

Figure : 1992-2019 mean – overturning streamfunction incl. GM (Sv)

# meridional streamfunction

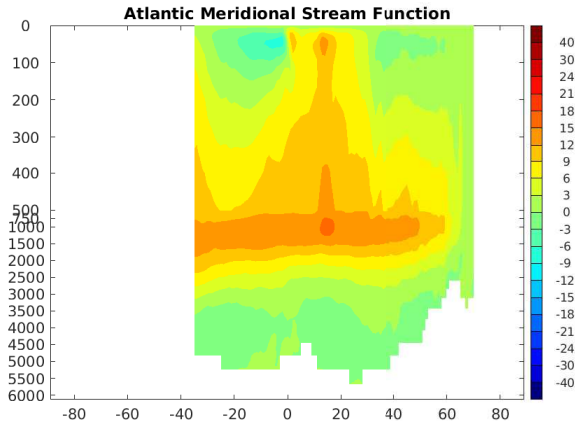

Figure : 1992-2019 mean – Atlantic overturning streamfunction (Sv)

# meridional streamfunction

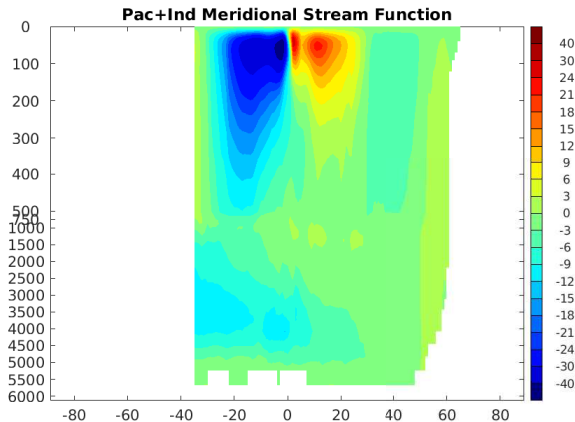

Figure : 1992-2019 mean – Pac+Ind overturning streamfunction (Sv)



# meridional streamfunction

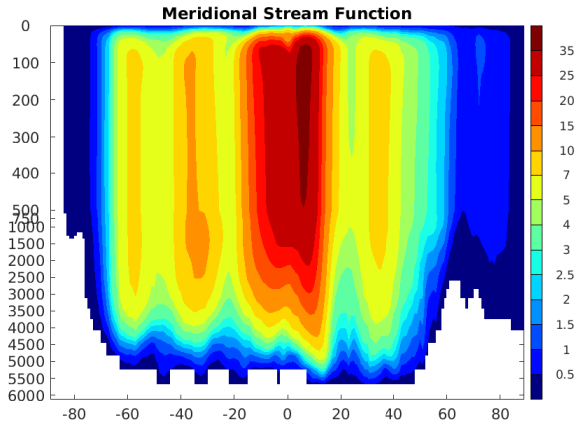

Figure : 1992-2019 standard deviation – overturning streamfunction ( $S_v$ )

# meridional streamfunction

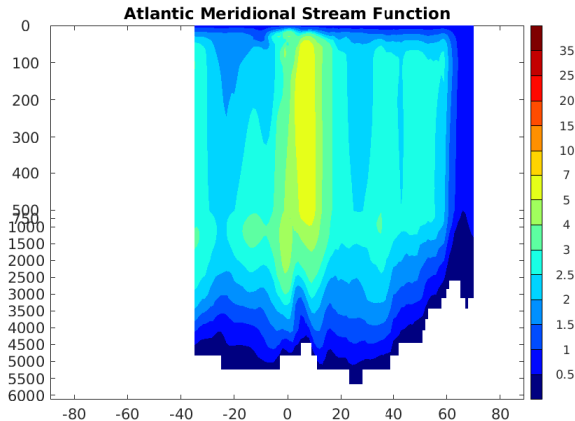

**Figure :** 1992-2019 standard deviation – Atlantic overturning streamfunction (Sv)

# meridional streamfunction (time series)

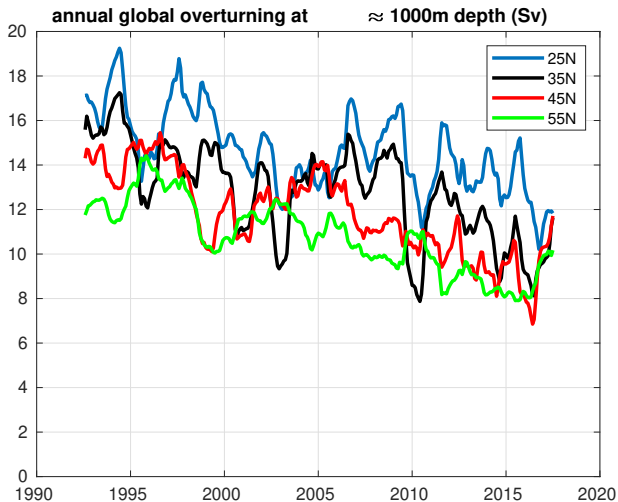

Figure : annual global overturning at select latitudes at  $\approx 1000\text{m}$  depth

# meridional streamfunction (time series)

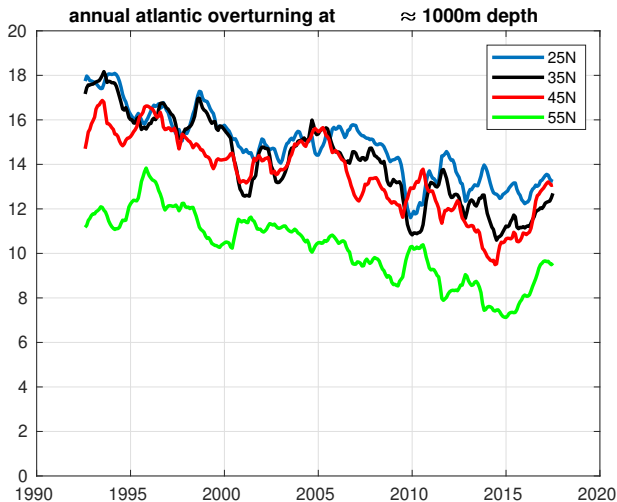

Figure : annual Atlantic overturning at select latitudes at  $\approx 1000\text{m}$  depth (Sv)

# meridional heat transport

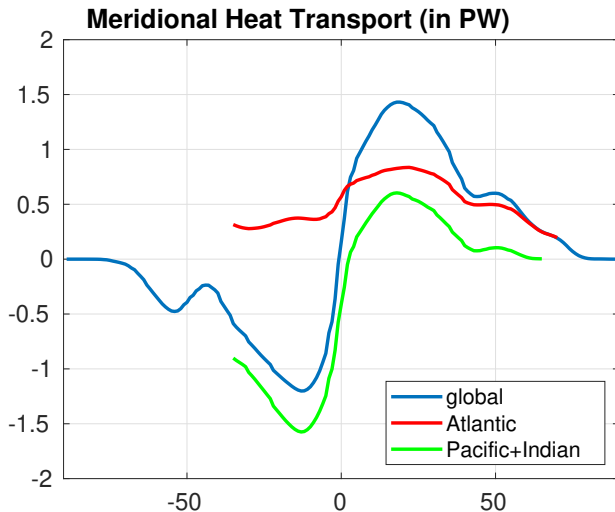

Figure : 1992-2019 mean – meridional heat transport (PW)

# meridional heat transport

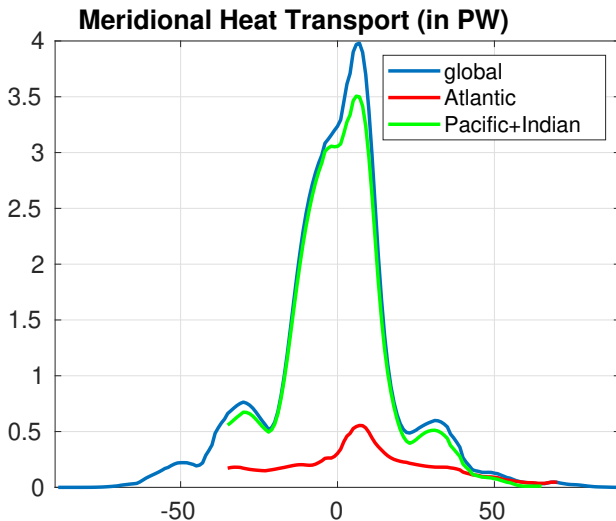

Figure : 1992-2019 standard deviation – meridional heat transport (PW)

# meridional seawater transport

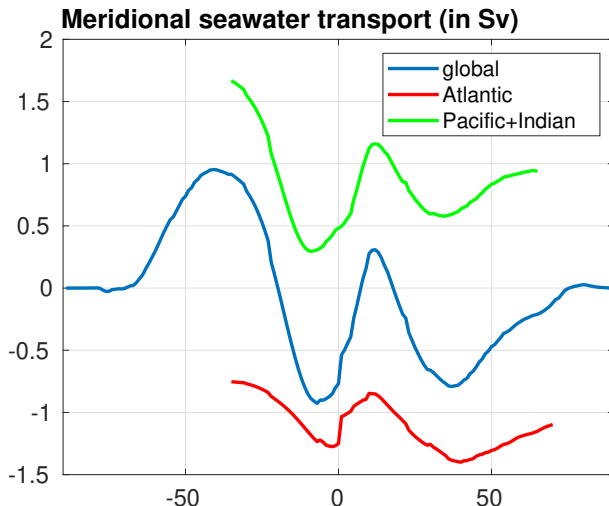

Figure : 1992-2019 mean – meridional seawater transport (Sv)

# meridional seawater transport

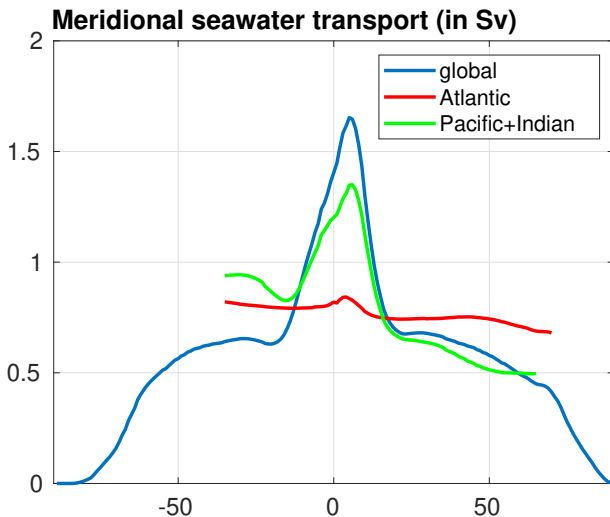

**Figure :** 1992-2019 standard deviation – meridional seawater transport (Sv)



# meridional salt transport

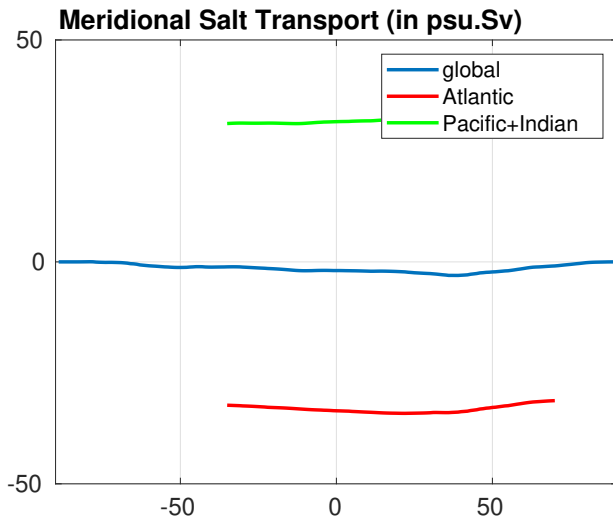

Figure : 1992-2019 mean – meridional salt transport ( $\text{psu.Sv}$ )

# meridional salt transport

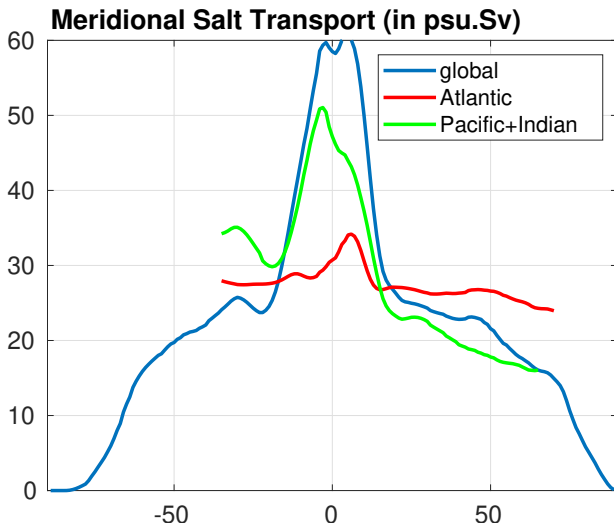

Figure : 1992-2019 standard deviation – meridional salt transport ( $\text{psu.Sv}$ )

# meridional transports (time series)

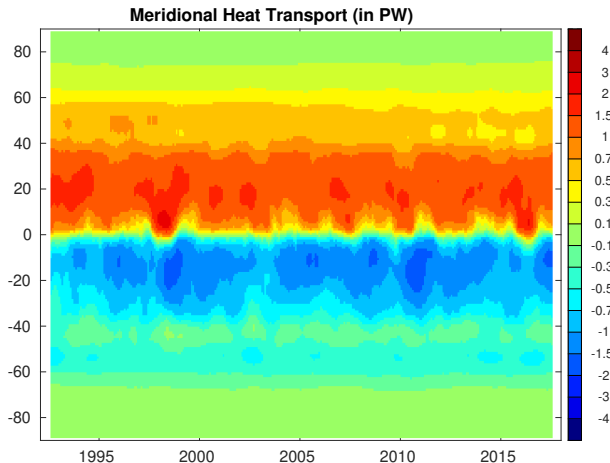

Figure : meridional heat transport (PW, annual mean)

# meridional transports (time series)

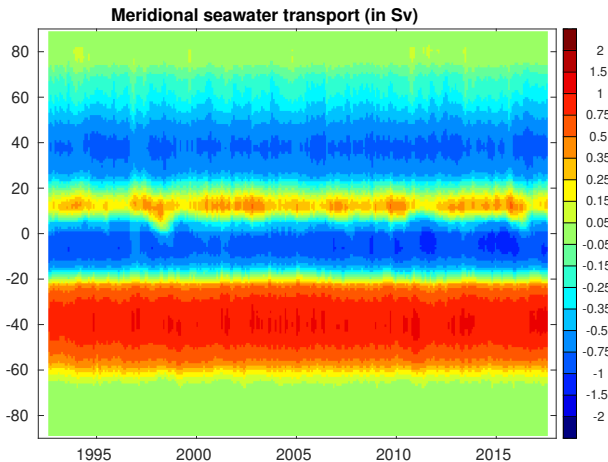

Figure : meridional seawater transport (Sv, annual mean)

# meridional transports (time series)

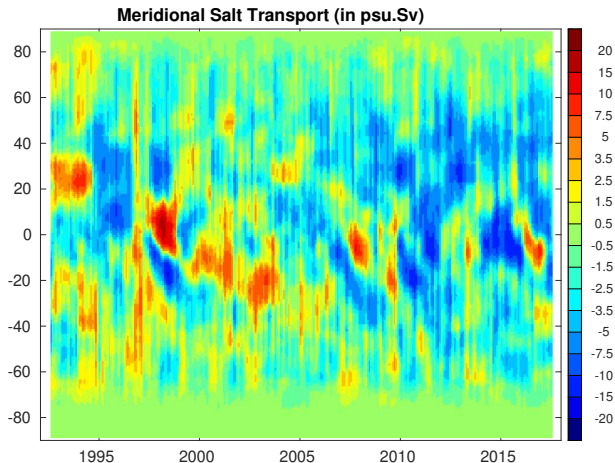

Figure : meridional salt transport ( $\text{psu.Sv}$ , annual mean)

# transects transport

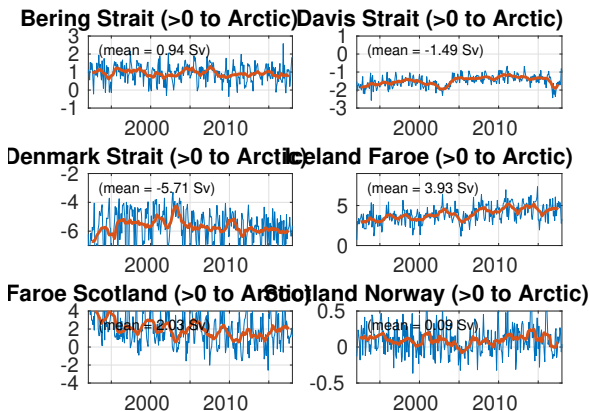

Figure : volume transports entering the Arctic (Sv, annual mean)

# transects transport

**Florida Strait (>0 to Atlantic)** **Florida Strait W1 (>0 to Atlantic)**

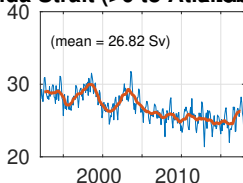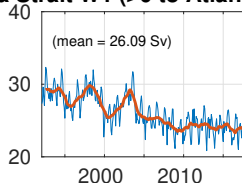

**Florida Strait E1 (>0 to Atlantic)** **Florida Strait E2 (>0 to Atlantic)**

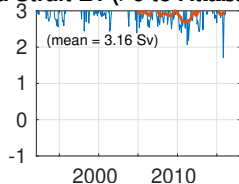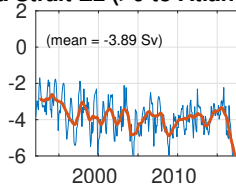

**Figure :** volume transports entering the Atlantic (Sv, annual mean)

# transects transport

**altar Overturn (upper ocean transport towards Med.)**

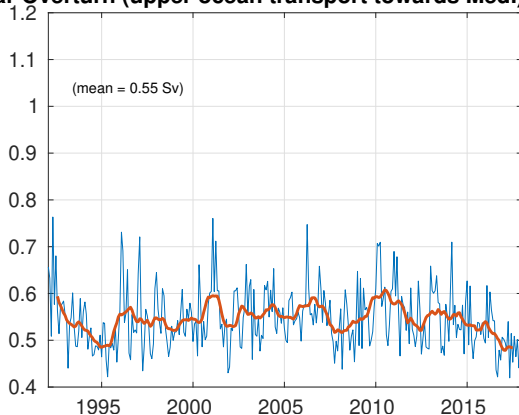

**Figure :** Gibraltar Overturn (Sv, annual mean)



# transects transport

**Drake Passage (>0 westward) Madagascar**

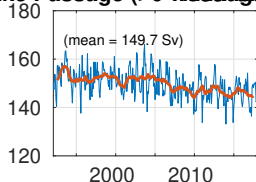

**Agulhas Current Antarctica (>0 westward)**

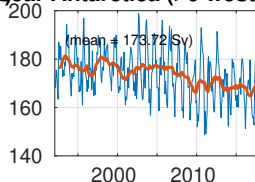

**Agulhas Channel (>0 westward) Antarctica (>0 westward)**

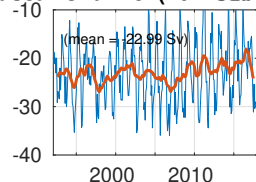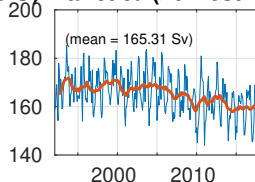

Figure : ACC volume transports (Sv, annual mean)

# transects transport

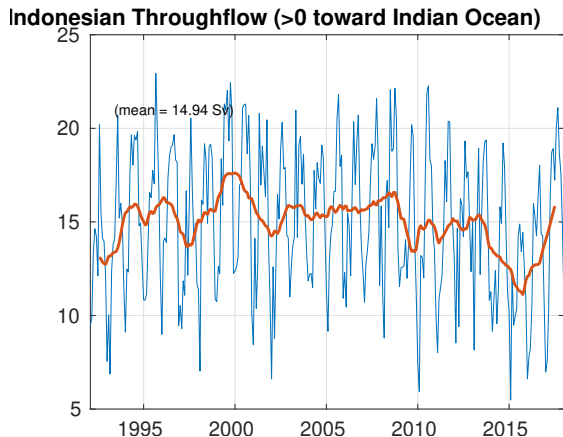

**Figure :** Indonesian Throughflow (Sv, annual mean)

# sea surface height

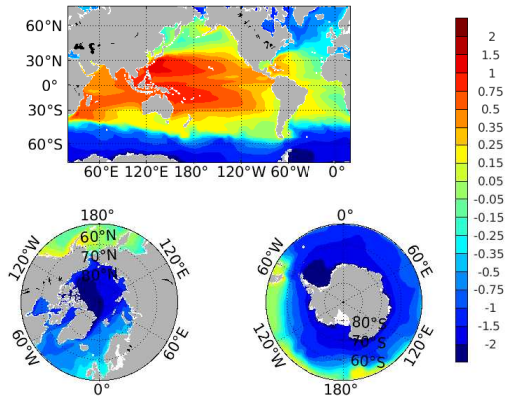

Figure : 1992-2019 mean – sea surface height (EXCLUDING ice, in m)

# sea surface height

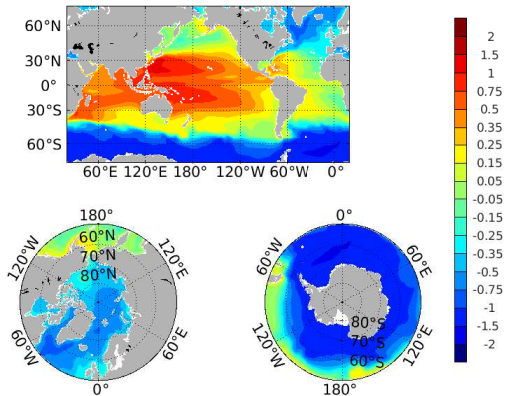

Figure : 1992-2019 mean – sea surface height (INCLUDING ice, in m)

# sea surface height

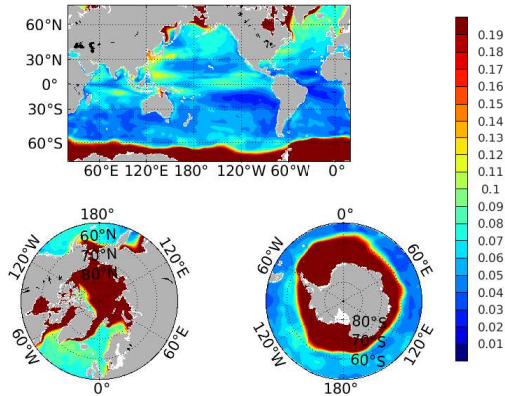

**Figure :** 1992-2019 standard deviation – sea surface height (EXCLUDING ice, in m)

# sea surface height

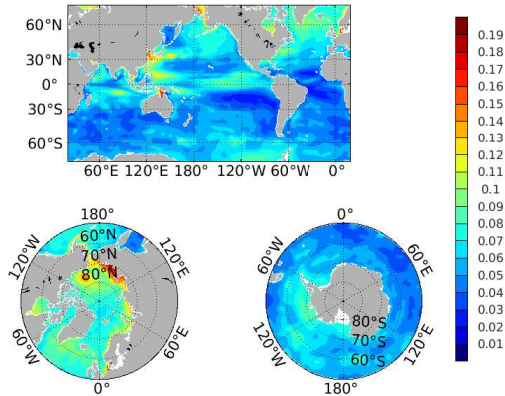

Figure : 1992-2019 standard deviation – sea surface height  
(INCLUDING ice, in m)

# 3D state variables

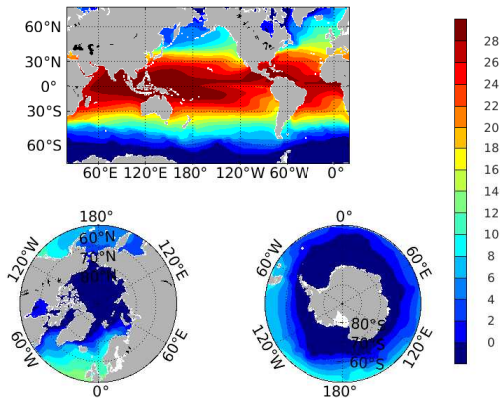

Figure : 1992-2019 mean – temperature (in degC) at 5m

# 3D state variables

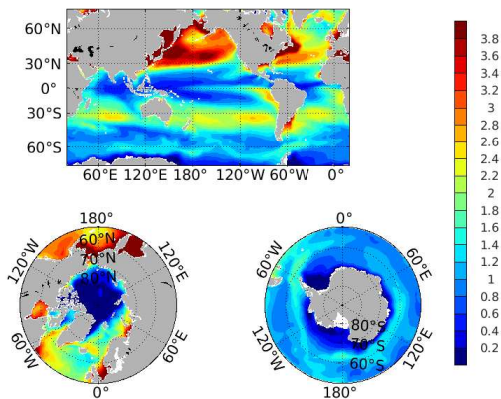

Figure : 1992-2019 standard deviation – temperature (in degC) at 5m



# 3D state variables

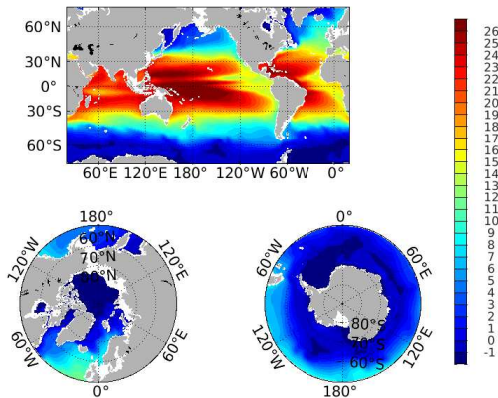

Figure : 1992-2019 mean – temperature (in degC) at 105m

# 3D state variables

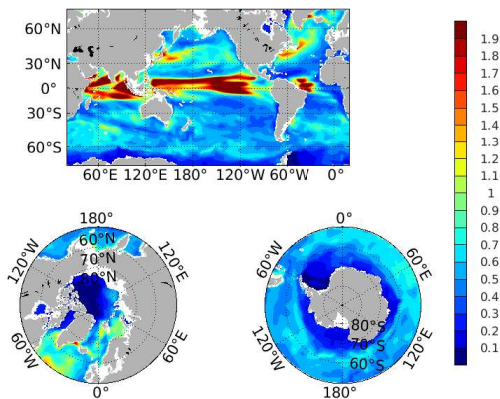

Figure : 1992-2019 standard deviation – temperature (in degC) at 105m

# 3D state variables

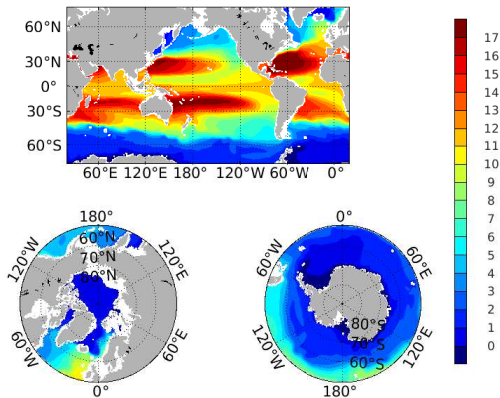

Figure : 1992-2019 mean – temperature (in degC) at 300m

# 3D state variables

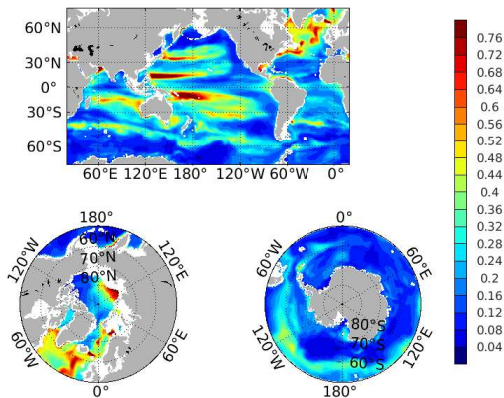

Figure : 1992-2019 standard deviation – temperature (in degC) at 300m

# 3D state variables

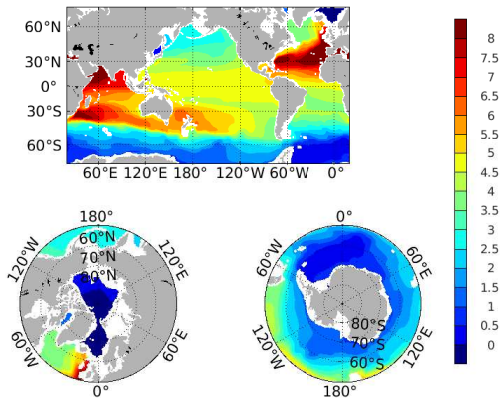

Figure : 1992-2019 mean – temperature (in degC) at 910m

# 3D state variables

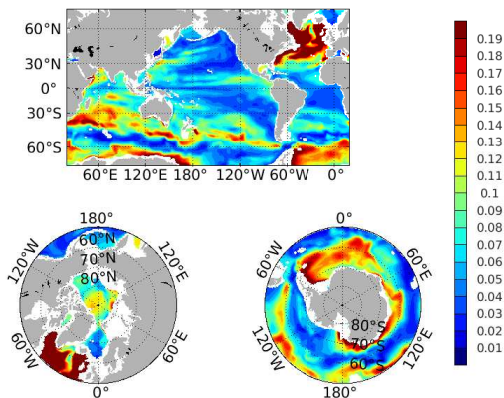

Figure : 1992-2019 standard deviation – temperature (in degC) at 910m

# 3D state variables

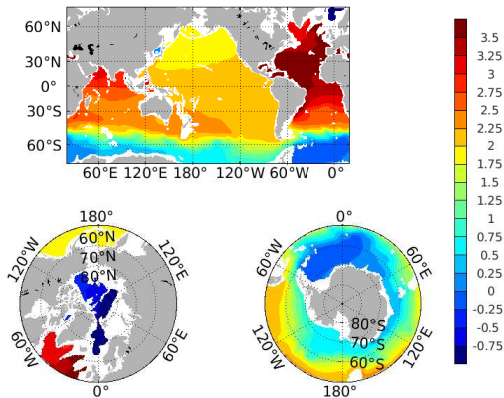

Figure : 1992-2019 mean – temperature (in degC) at 1914m

# 3D state variables

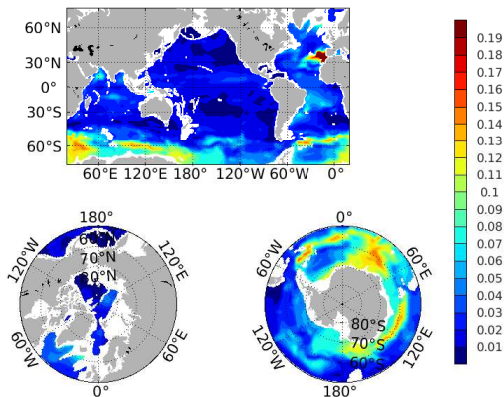

Figure : 1992-2019 standard deviation – temperature (in degC) at 1914m



# 3D state variables

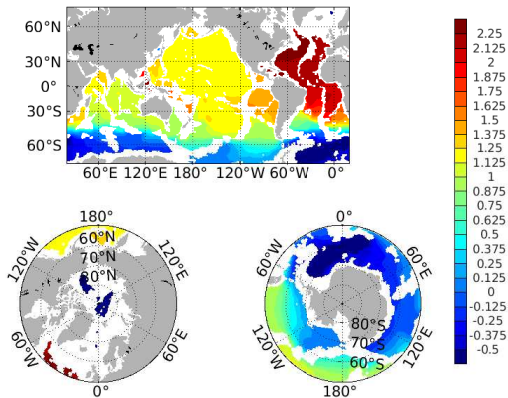

Figure : 1992-2019 mean – temperature (in degC) at 3581m

# 3D state variables

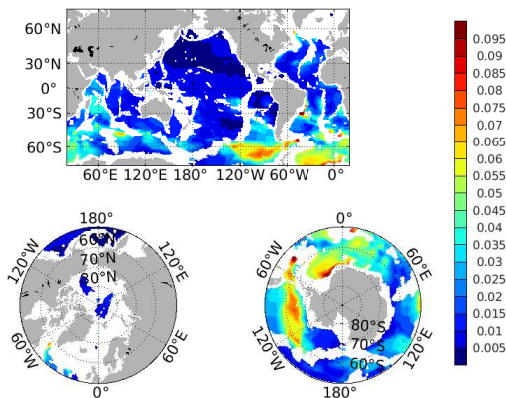

Figure : 1992-2019 standard deviation – temperature (in degC) at 3581m

# 3D state variables

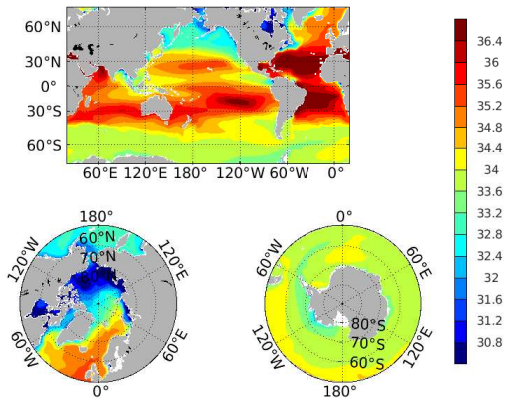

Figure : 1992-2019 mean – salinity (in psu) at 5m

# 3D state variables

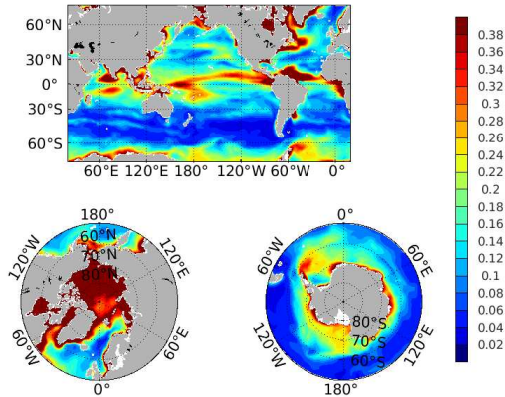

Figure : 1992-2019 standard deviation – salinity (in psu) at 5m

# 3D state variables

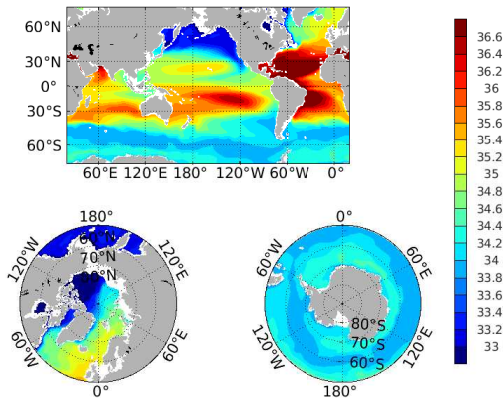

Figure : 1992-2019 mean – salinity (in psu) at 105m

# 3D state variables

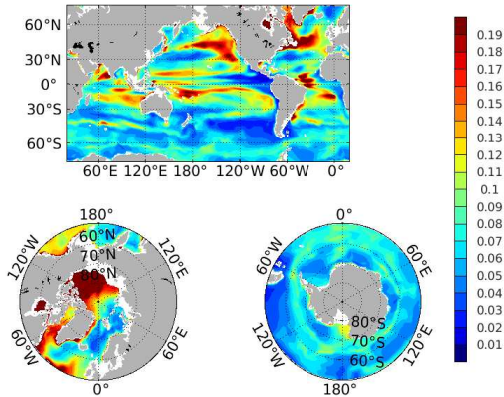

Figure : 1992-2019 standard deviation – salinity (in psu) at 105m

# 3D state variables

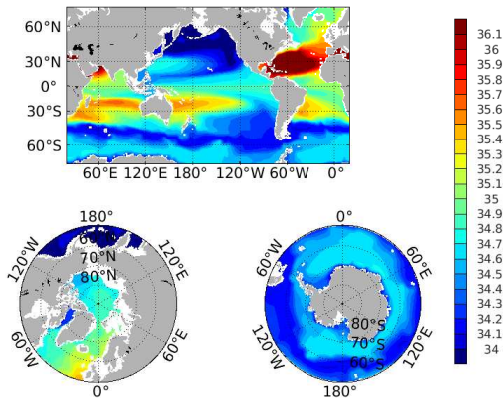

Figure : 1992-2019 mean – salinity (in psu) at 300m

# 3D state variables

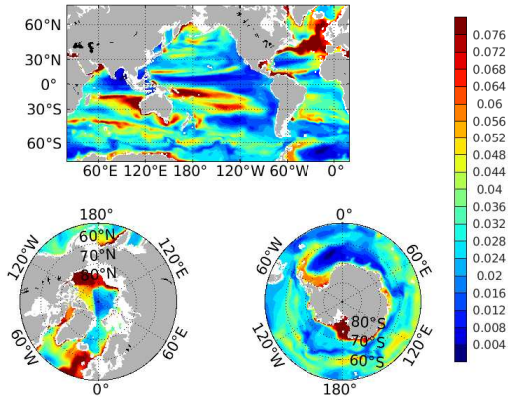

Figure : 1992-2019 standard deviation – salinity (in psu) at 300m



# 3D state variables

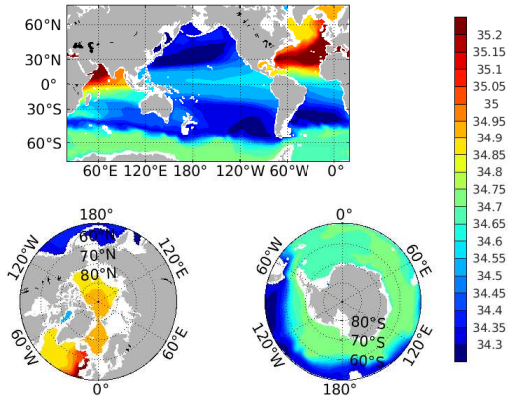

Figure : 1992-2019 mean – salinity (in psu) at 910m

# 3D state variables

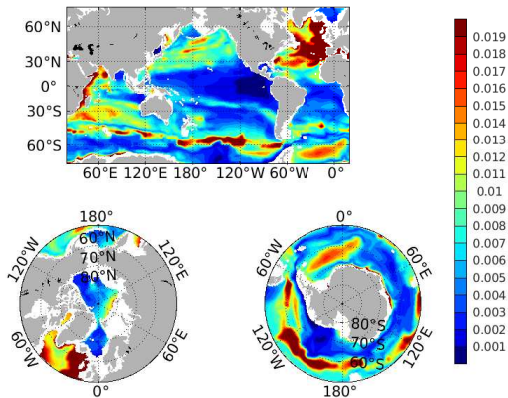

Figure : 1992-2019 standard deviation – salinity (in psu) at 910m

# 3D state variables

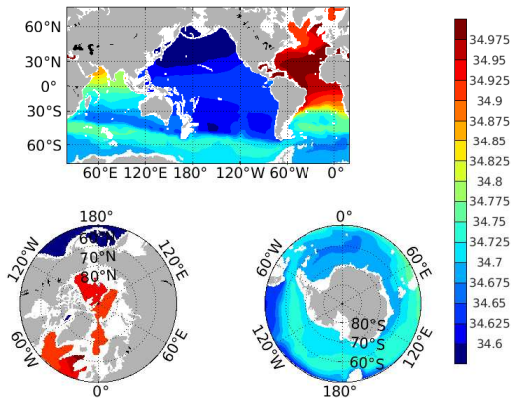

Figure : 1992-2019 mean – salinity (in psu) at 1914m

# 3D state variables

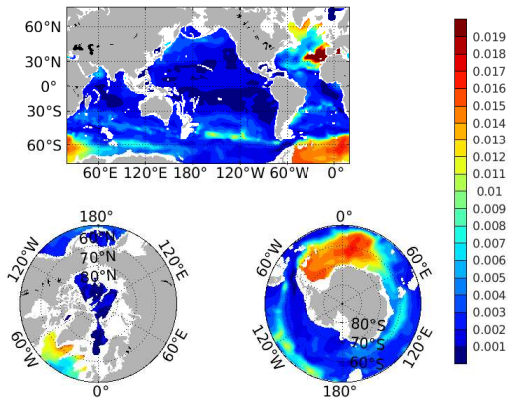

Figure : 1992-2019 standard deviation – salinity (in psu) at 1914m

# 3D state variables

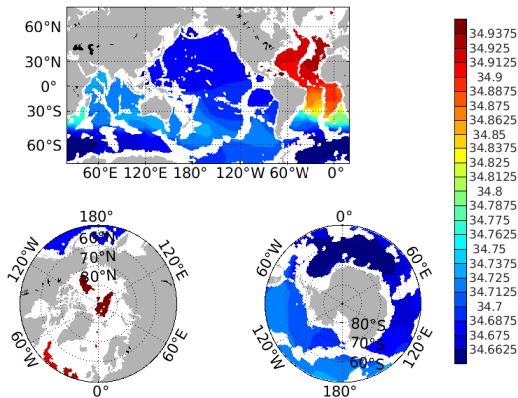

Figure : 1992-2019 mean – salinity (in psu) at 3581m

# 3D state variables

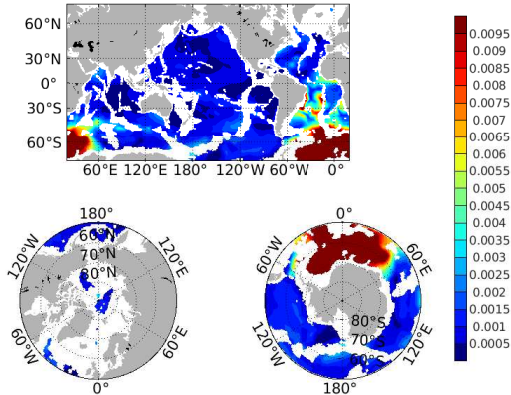

Figure : 1992-2019 standard deviation – salinity (in psu) at 3581m

# 3D state variables

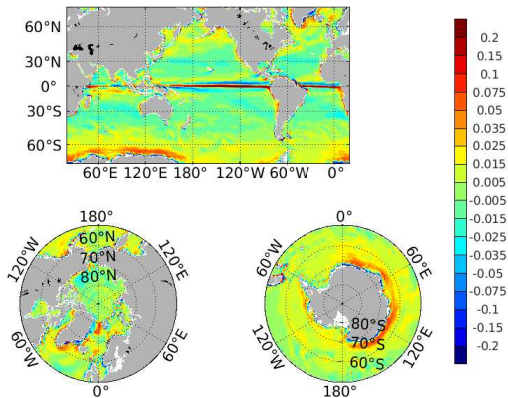

Figure : 1992-2019 mean – vertical velocity (in mm/year) at 15m

# 3D state variables

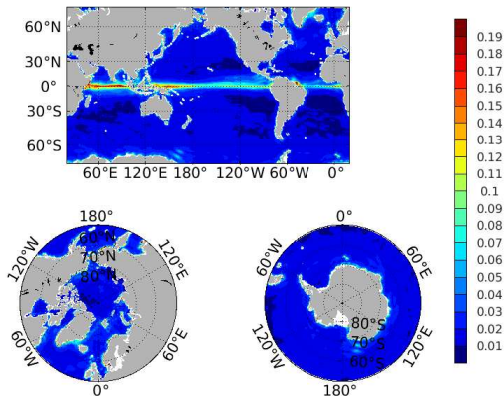

Figure : 1992-2019 standard deviation – vertical velocity (in mm/year) at 15m



# 3D state variables

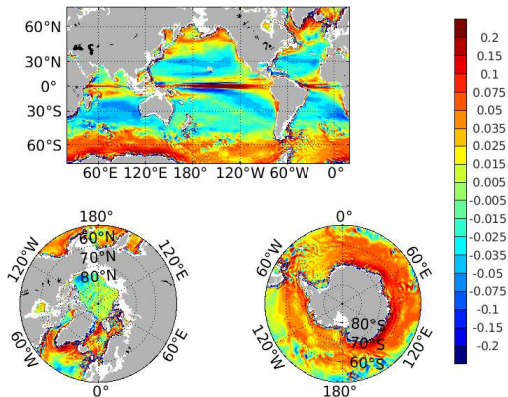

Figure : 1992-2019 mean – vertical velocity (in mm/year) at 105m

# 3D state variables

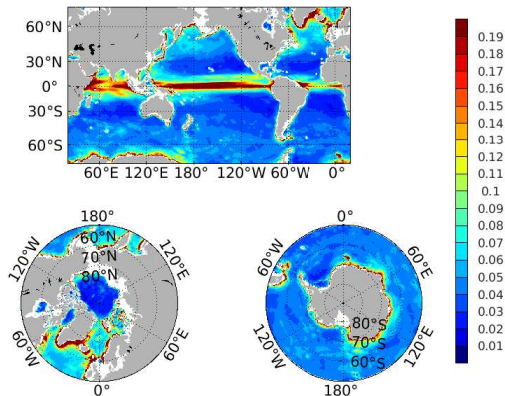

Figure : 1992-2019 standard deviation – vertical velocity (in mm/year) at 105m

# 3D state variables

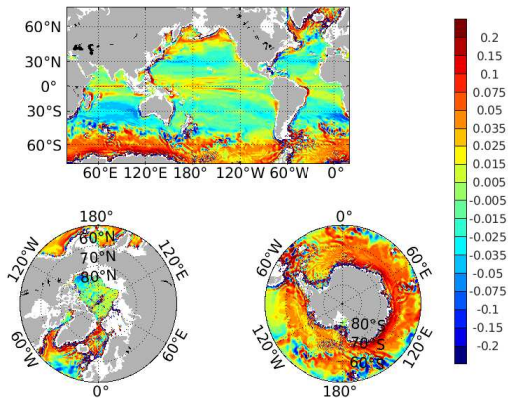

Figure : 1992-2019 mean – vertical velocity (in mm/year) at 300m

# 3D state variables

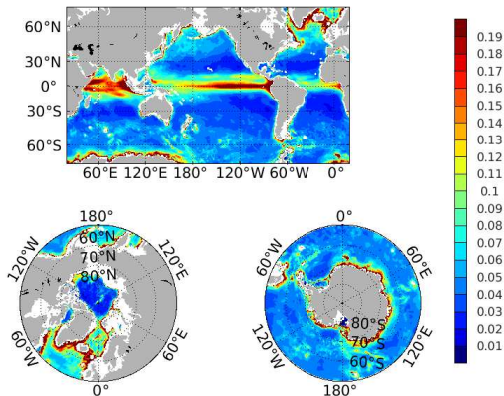

Figure : 1992-2019 standard deviation – vertical velocity (in mm/year) at 300m

# 3D state variables

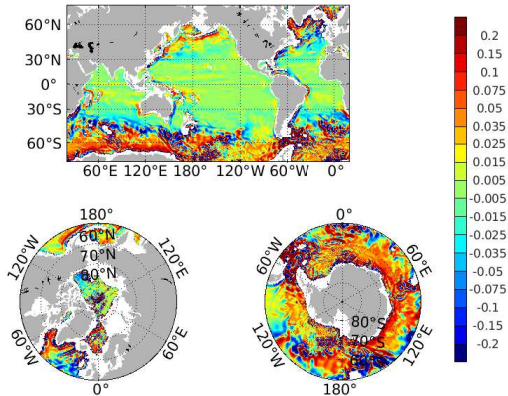

Figure : 1992-2019 mean – vertical velocity (in mm/year) at 910m

# 3D state variables

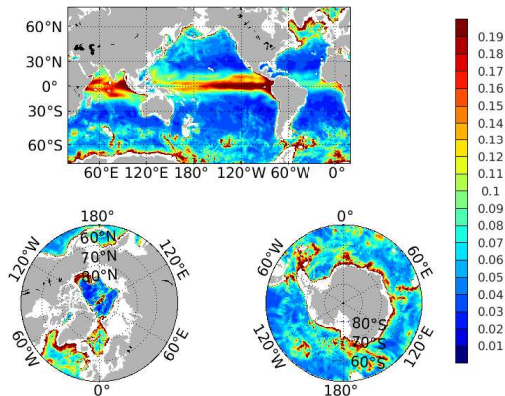

Figure : 1992-2019 standard deviation – vertical velocity (in mm/year) at 910m

# 3D state variables

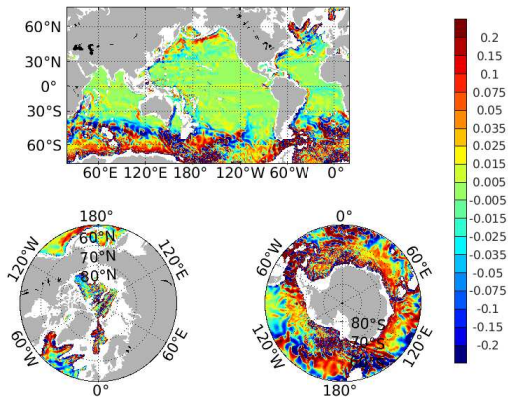

Figure : 1992-2019 mean – vertical velocity (in mm/year) at 1914m

# 3D state variables

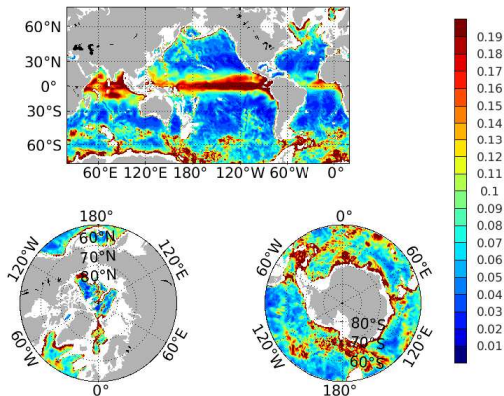

Figure : 1992-2019 standard deviation – vertical velocity (in mm/year) at 1914m



# 3D state variables

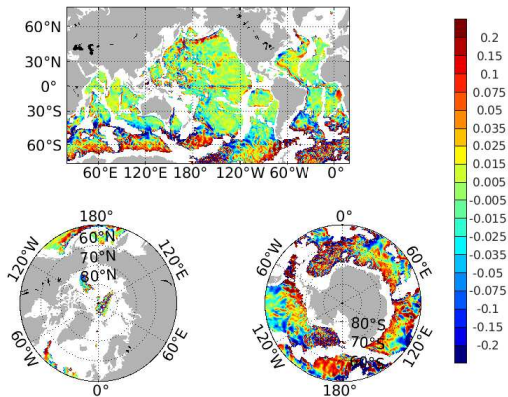

Figure : 1992-2019 mean – vertical velocity (in mm/year) at 3581m

# 3D state variables

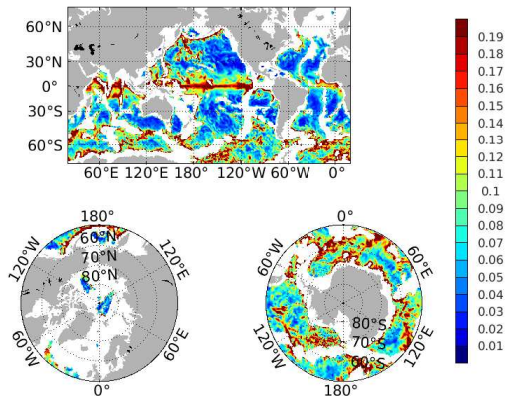

Figure : 1992-2019 standard deviation – vertical velocity (in mm/year) at 3581m

# air-sea heat flux

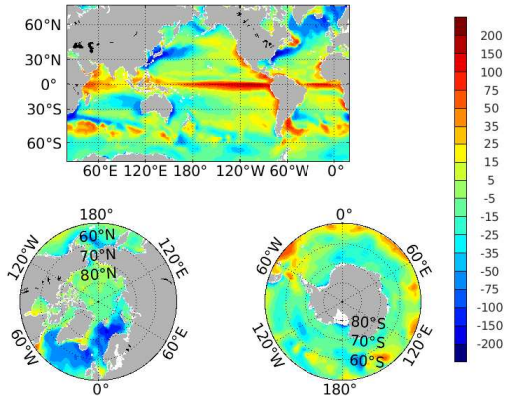

Figure : 1992-2019 mean – QNET to ocean+ice ( $\text{W/m}^2$ )

# air-sea heat flux

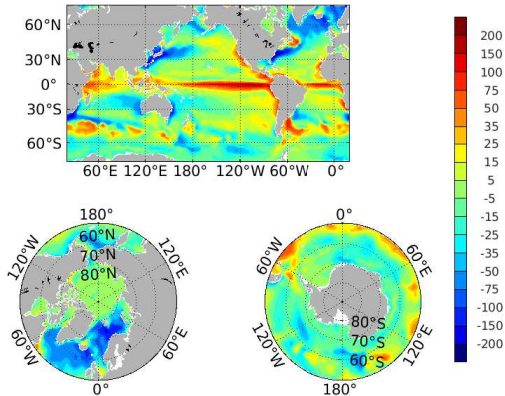

Figure : 1992-2019 mean – QNET to ocean ( $\text{W/m}^2$ )

# air-sea heat flux

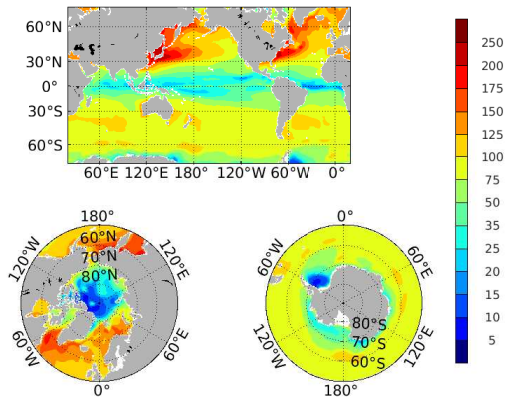

Figure : 1992-2019 standard deviation – QNET to ocean+ice ( $\text{W/m}^2$ )

# air-sea heat flux

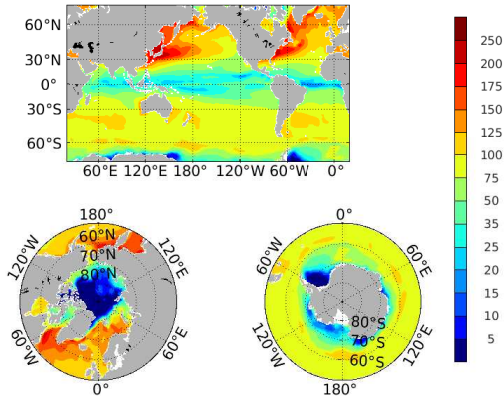

Figure : 1992-2019 standard deviation – QNET to ocean ( $\text{W/m}^2$ )

# air-sea freshwater flux

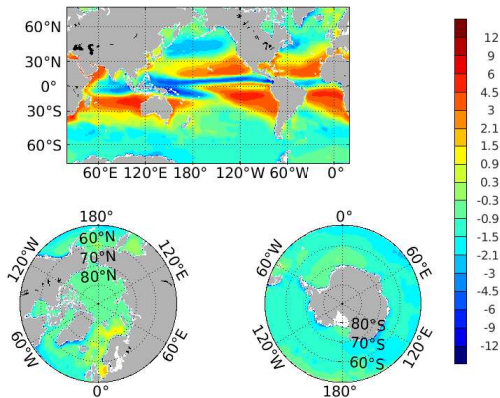

Figure : 1992-2019 mean – E-P-R from ocean+ice (mm/day)

# air-sea freshwater flux

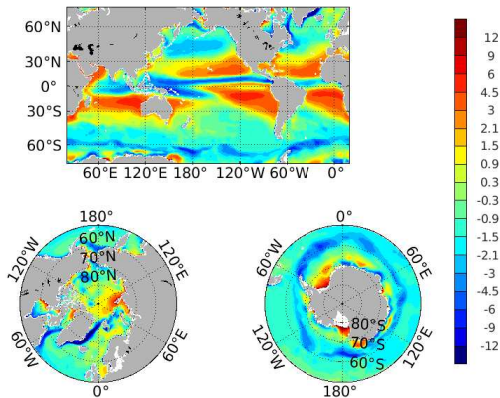

Figure : 1992-2019 mean – E-P-R from ocean (mm/day)



# air-sea freshwater flux

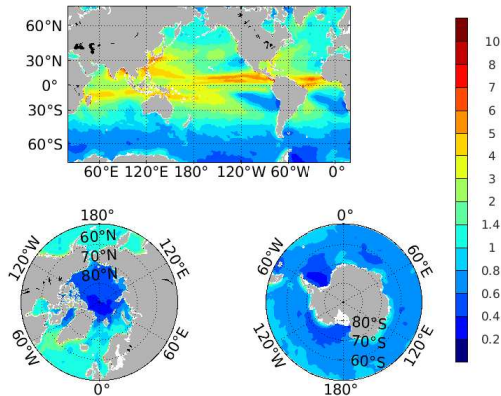

Figure : 1992-2019 standard deviation – E-P-R to ocean+ice ( $\text{W}/\text{m}^2$ )

# air-sea freshwater flux

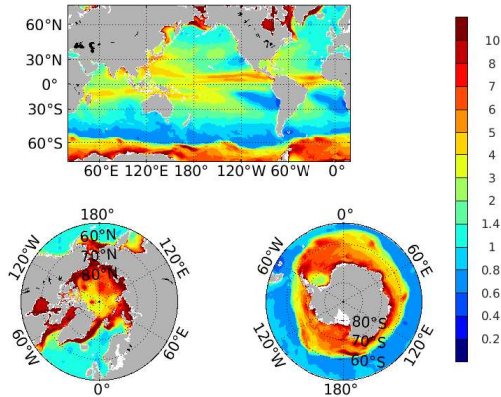

Figure : 1992-2019 standard deviation – E-P-R to ocean ( $\text{W/m}^2$ )

# surface wind stress

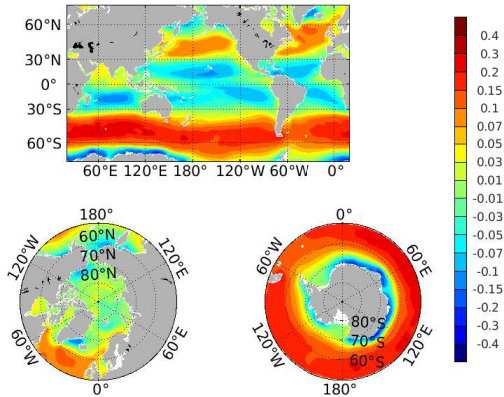

Figure : 1992-2019 mean – zonal wind stress ( $\text{N/m}^2$ )

# surface wind stress

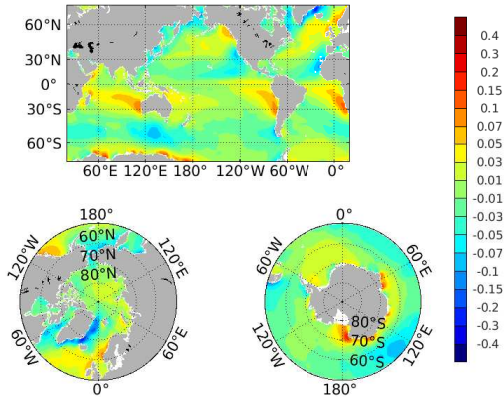

Figure : 1992-2019 mean – meridional wind stress ( $\text{N/m}^2$ )

# surface wind stress

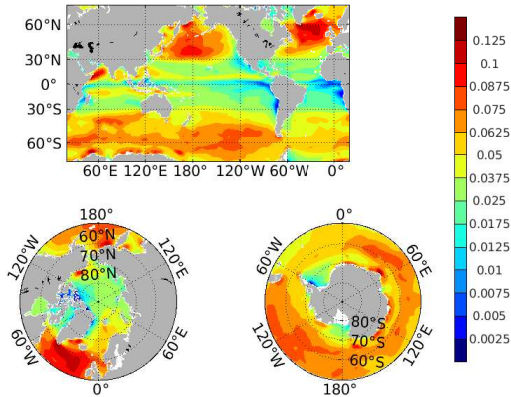

Figure : 1992-2019 standard deviation –  $\tau_Z$  ( $\text{W/m}^2$ )

# surface wind stress

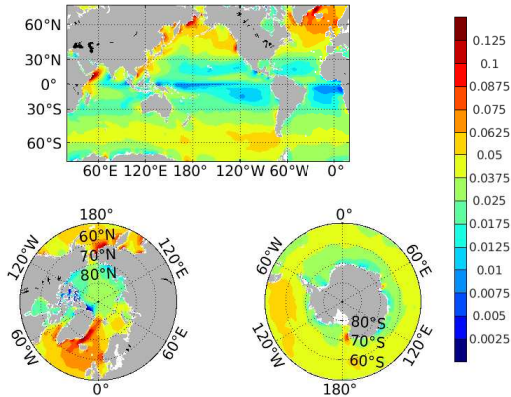

Figure : 1992-2019 standard deviation – tauM ( $\text{W/m}^2$ )

# zonal mean tendencies

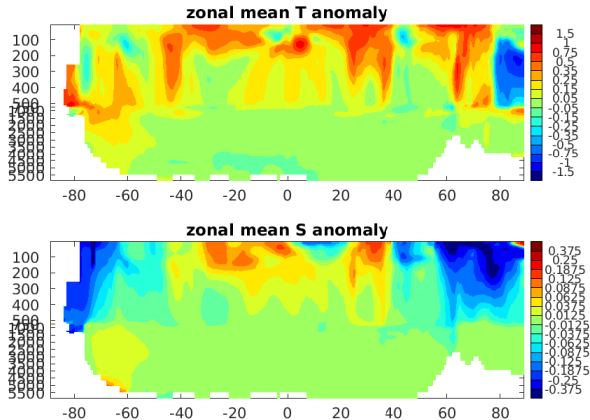

Figure : 1992-2019 , last year minus first year – zonal mean temperature (degC; top) and salinity (psu; bottom)

# equatorial sections

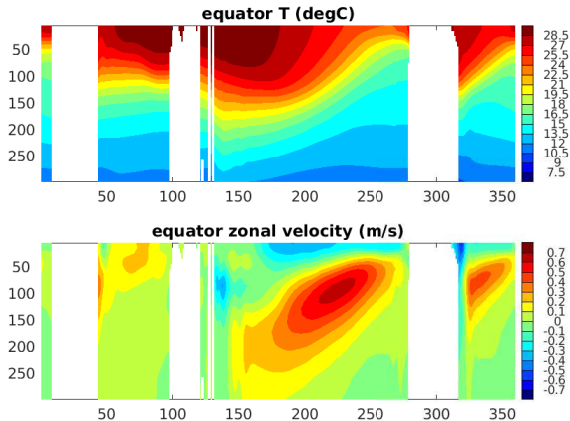

Figure : 1992-2019 mean – equator temperature (degC;top) and zonal velocity (m/s;bottom)



# global mean properties

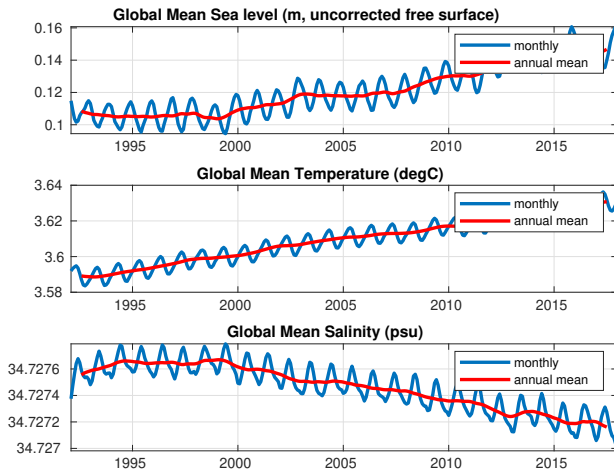

Figure : global mean T (degC; top) and S (psu; bottom)

# global mean properties

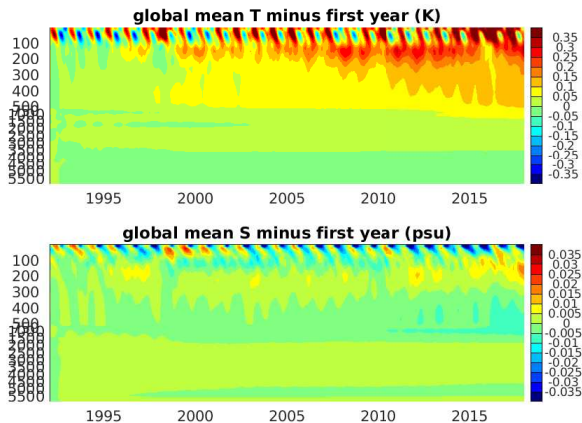

Figure : global mean temperature (K; top) and salinity (psu; bottom) minus first year

# zonal mean properties

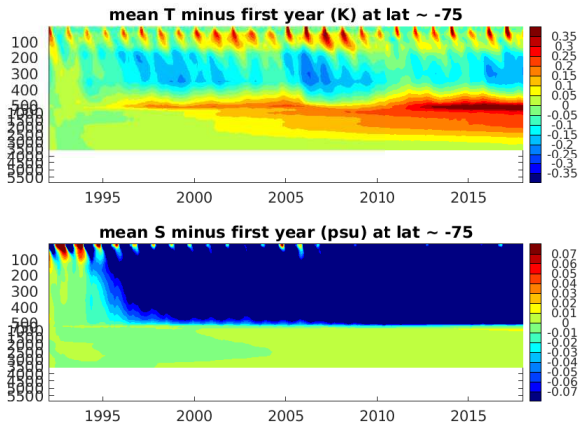

Figure : mean temperature (top; K) and salinity (bottom; psu) minus first year at lat  $\approx -75$

# zonal mean properties

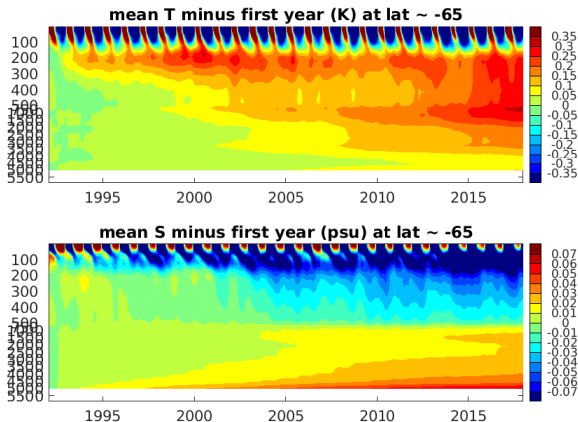

Figure : mean temperature (top; K) and salinity (bottom; psu) minus first year at lat  $\approx -65$

# zonal mean properties

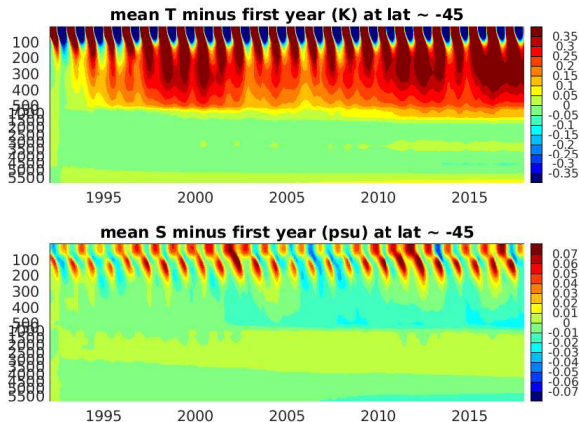

**Figure :** mean temperature (top; K) and salinity (bottom; psu) minus first year at lat  $\approx -45$

# zonal mean properties

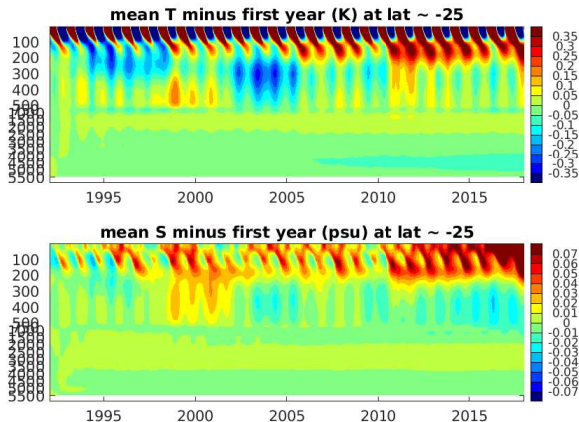

**Figure :** mean temperature (top; K) and salinity (bottom; psu) minus first year at lat  $\approx -25$

# zonal mean properties

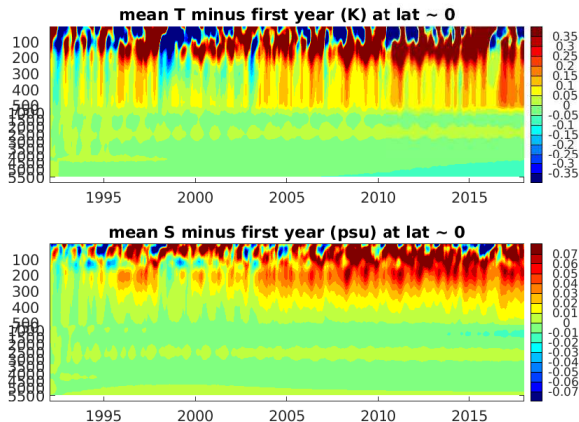

**Figure :** mean temperature (top; K) and salinity (bottom; psu) minus first year at lat  $\approx 0$

# zonal mean properties

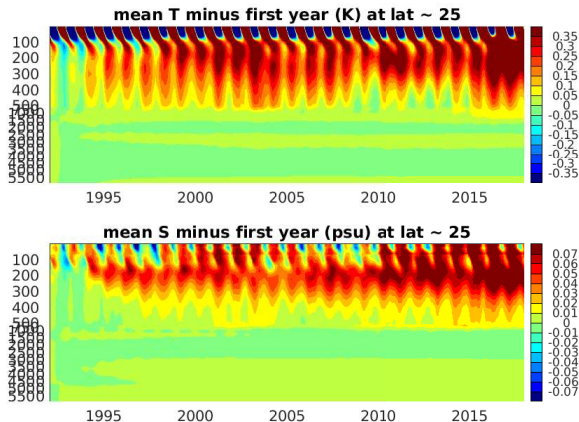

Figure : mean temperature (top; K) and salinity (bottom; psu) minus first year at lat  $\approx 25$



# zonal mean properties

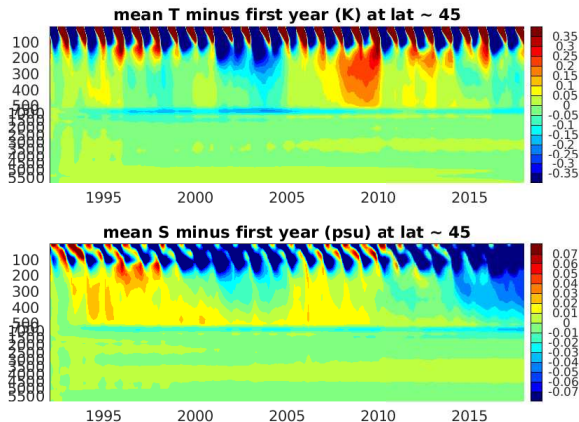

Figure : mean temperature (top; K) and salinity (bottom; psu) minus first year at lat  $\approx 45$

# zonal mean properties

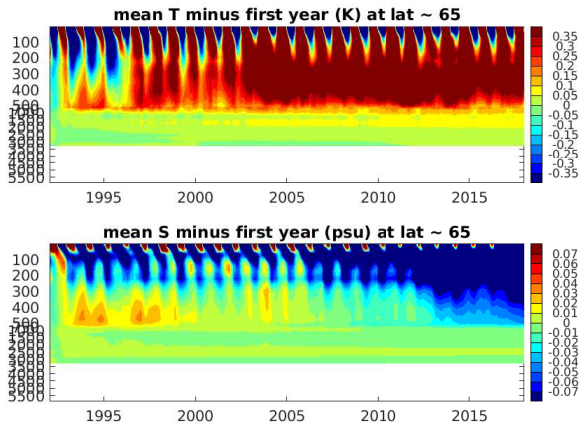

Figure : mean temperature (top; K) and salinity (bottom; psu) minus first year at lat  $\approx 65$

# zonal mean properties

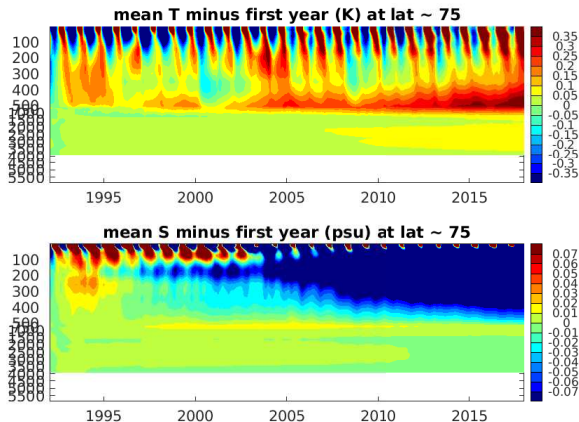

**Figure :** mean temperature (top; K) and salinity (bottom; psu) minus first year at lat  $\approx 75$

# zonal mean properties (surface)

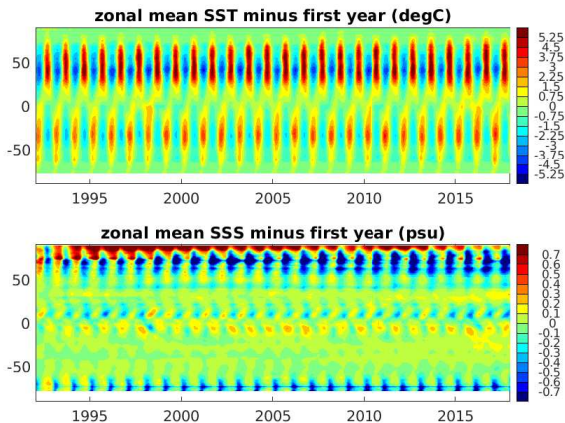

Figure : zonal mean temperature (degC; top) and salinity (psu; bottom) minus first year (psu) at 5m depth

# zonal mean properties (surface)

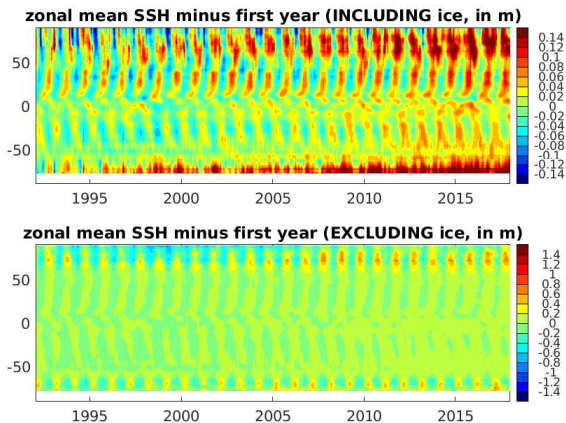

**Figure :** zonal mean SSH (m, uncorrected free surface) minus first year, including ice (top) and below ice (bottom)

# zonal mean properties (surface)

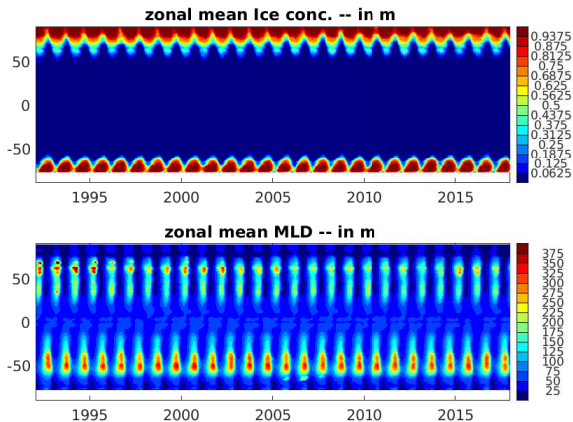

Figure : zonal mean ice concentration (no units) and mixed layer depth (m)

# seaice time series

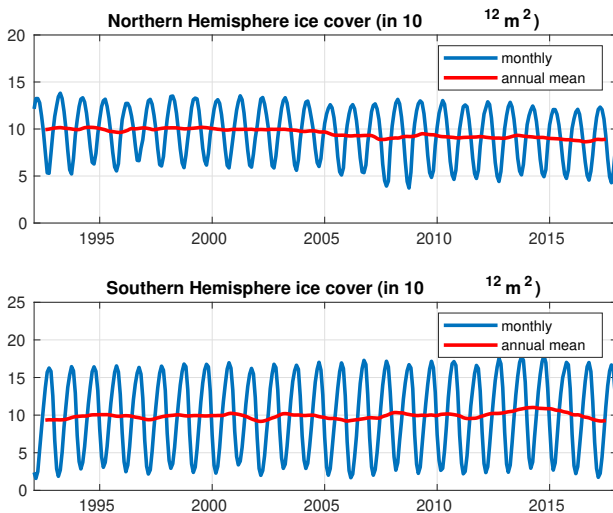

Figure : sea ice cover (in  $10^{12} m^2$ ) in northern (top) and southern (bottom) hemisphere

# seaice time series

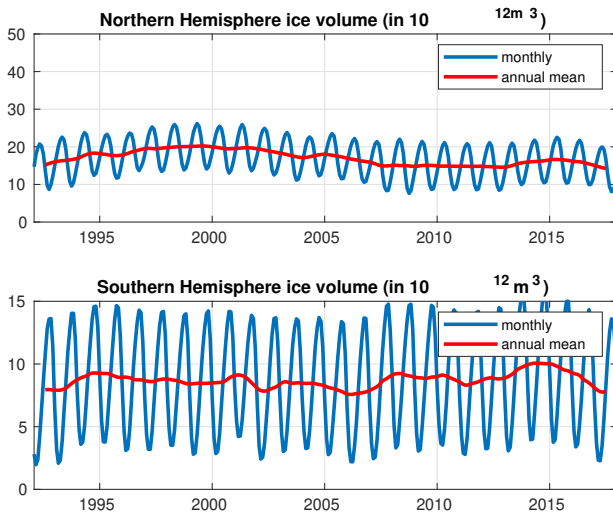

Figure : sea ice volume (in  $10^{12} \text{ m}^3$ ) in northern (top) and southern (bottom) hemisphere



# seaice time series

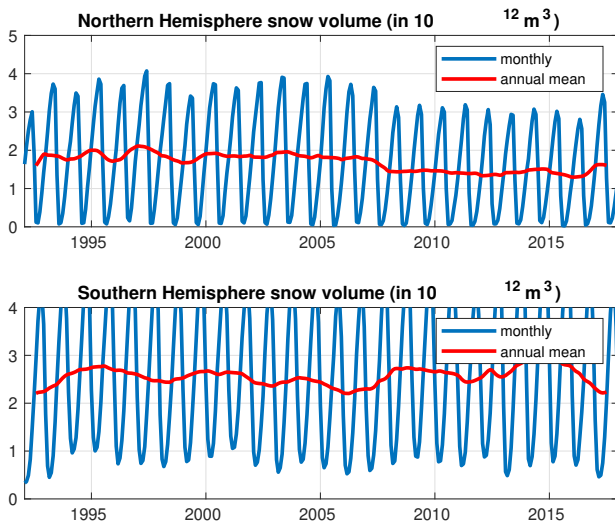

Figure : snow volume (in  $10^{12} m^3$ ) in northern (top) and southern (bottom) hemisphere

# seaice time series

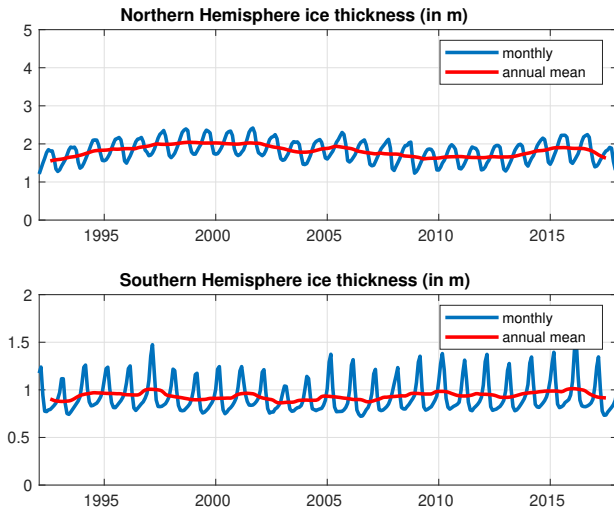

Figure : sea ice thickness (in m) in northern (top) and southern (bottom) hemisphere

# seaice time series

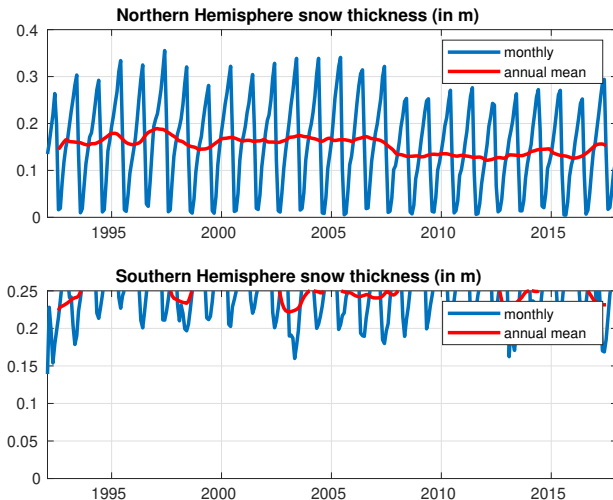

Figure : snow thickness (in m) in northern (top) and southern (bottom) hemisphere

# Mixed Layer Depth Fields

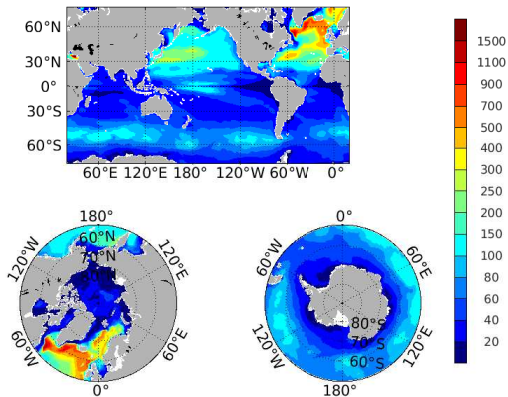

Figure : 1992-2019 March mean – mixed layer depth per Kara formula (m)

# Mixed Layer Depth Fields

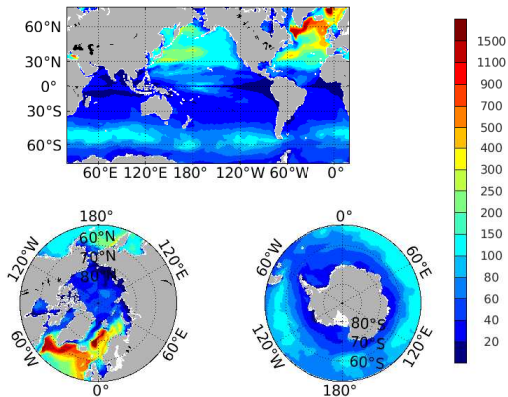

Figure : 1992-2019 March mean – mixed layer depth per Suga formula (m)

# Mixed Layer Depth Fields

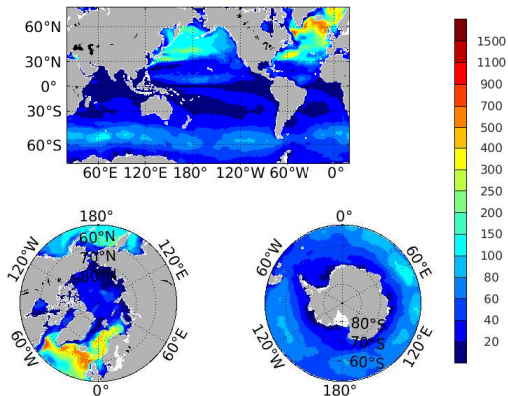

Figure : 1992-2019 March mean – mixed layer depth per Boyer M. formula (m)

# Mixed Layer Depth Fields

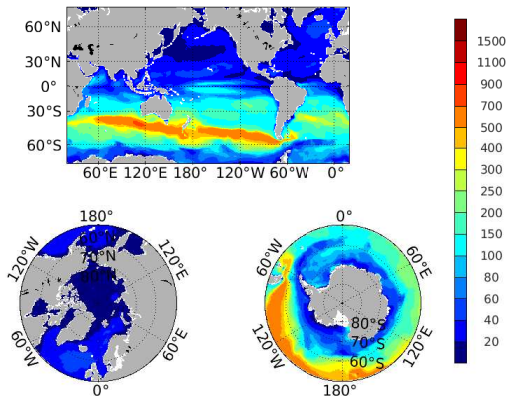

Figure : 1992-2019 September mean – mixed layer depth per Kara formula (m)

# Mixed Layer Depth Fields

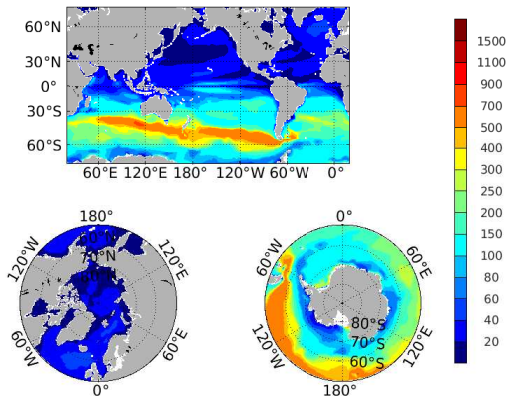

Figure : 1992-2019 September mean – mixed layer depth per Suga formula (m)



# Mixed Layer Depth Fields

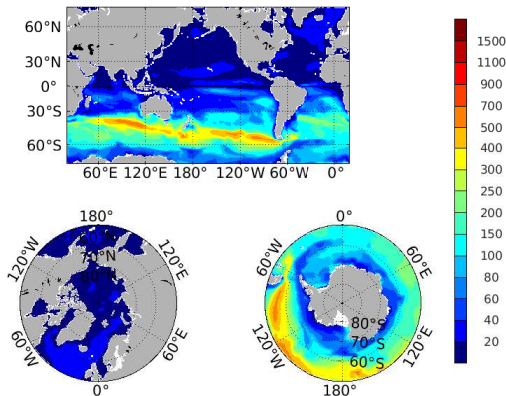

Figure : 1992-2019 September mean – mixed layer depth per Boyer M. formula (m)

# Monthly Thickness Distribution

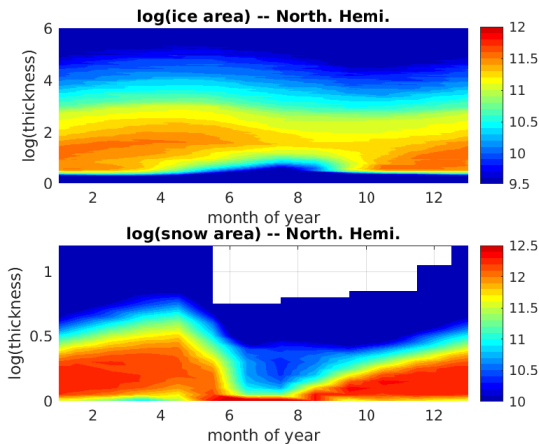

Figure : 1992-2019 Northern Hemisphere : monthly mean ice (top) and snow (bottom) thickness distribution (in  $\log(\text{m}^2)$ )

# Monthly Thickness Distribution

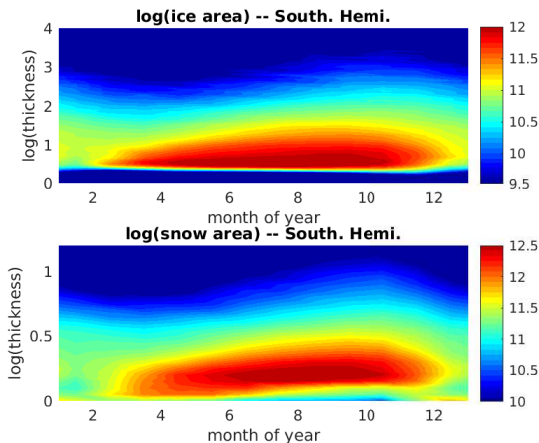

Figure : 1992-2019 Southern Hemisphere : monthly mean ice (top) and snow (bottom) thickness distribution (in  $\log(\text{m}^2)$ )

# Northern Hem. in March

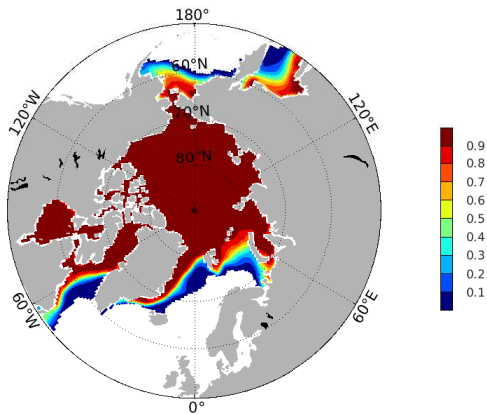

Figure : 1992-2019 March mean – ice concentration (unitless)

# Northern Hem. in March

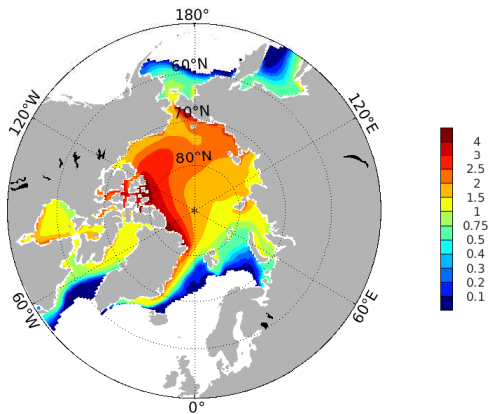

Figure : 1992-2019 March mean – ice thickness (m)

# Northern Hem. in March

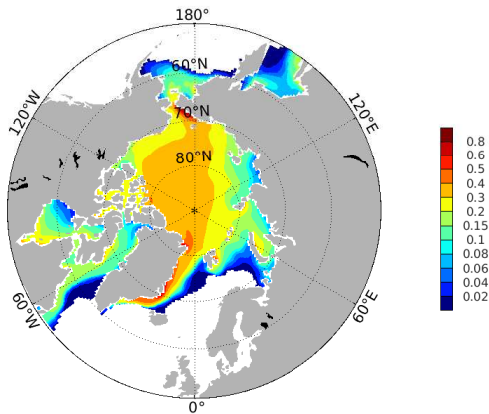

Figure : 1992-2019 March mean – snow thickness (m)

# Northern Hem. in March

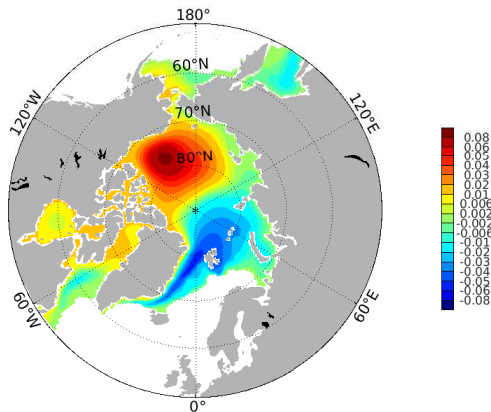

Figure : 1992-2019 March mean – ice+snow streamfunction (megaton/s)

# Northern Hem. in March

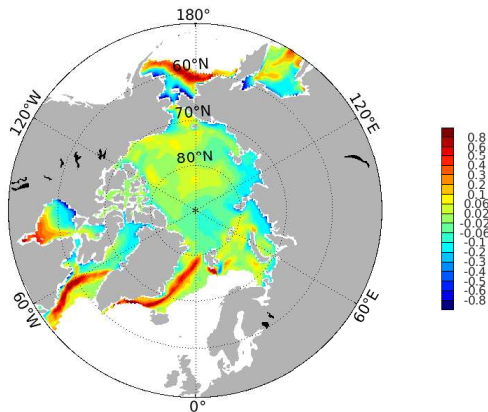

Figure : 1992-2019 March mean – ice+snow convergence (kiloton/s)



# Northern Hem. in September

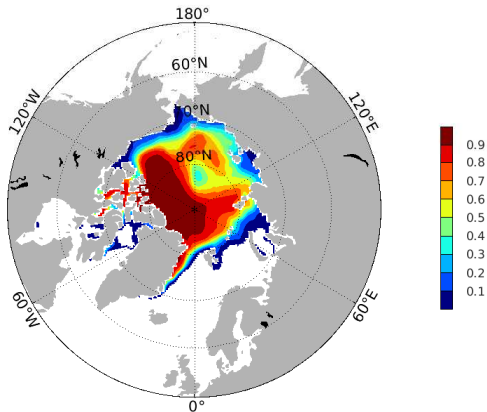

Figure : 1992-2019 September mean – ice concentration (unitless)

# Northern Hem. in September

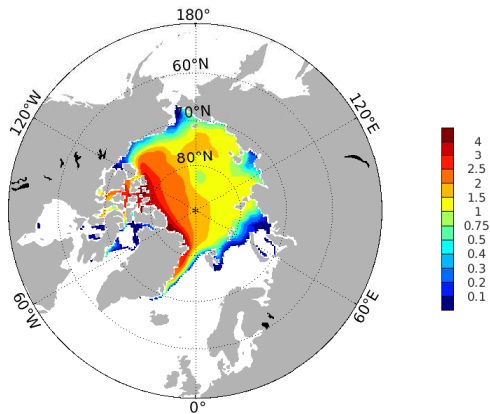

Figure : 1992-2019 September mean – ice thickness (m)

# Northern Hem. in September

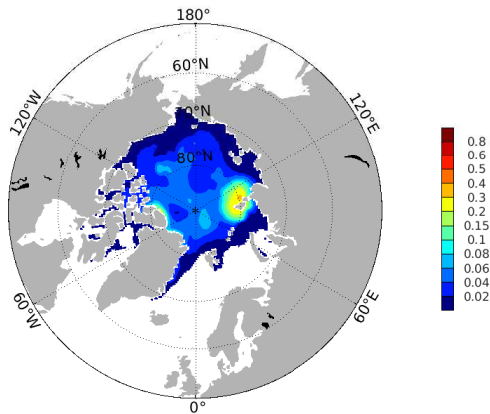

Figure : 1992-2019 September mean – snow thickness (m)

# Northern Hem. in September

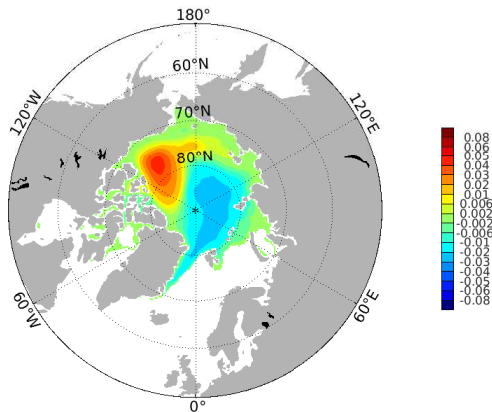

Figure : 1992-2019 September mean – ice+snow streamfunction (megaton/s)

# Northern Hem. in September

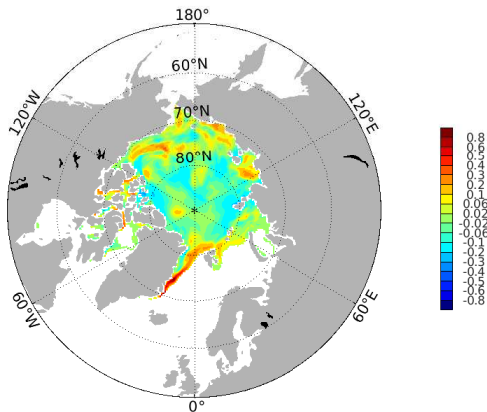

Figure : 1992-2019 September mean – ice+snow convergence (kiloton/s)

# Southern Hem. in March

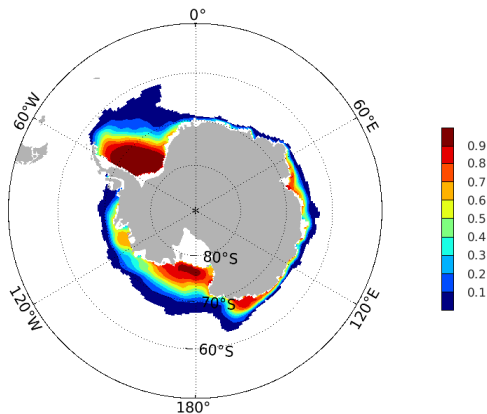

Figure : 1992-2019 March mean – ice concentration (unitless)

# Southern Hem. in March

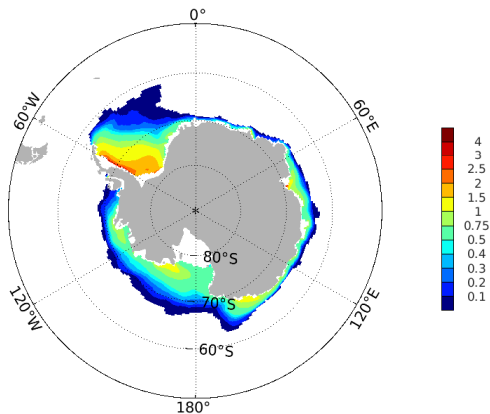

Figure : 1992-2019 March mean – ice thickness (m)

# Southern Hem. in March

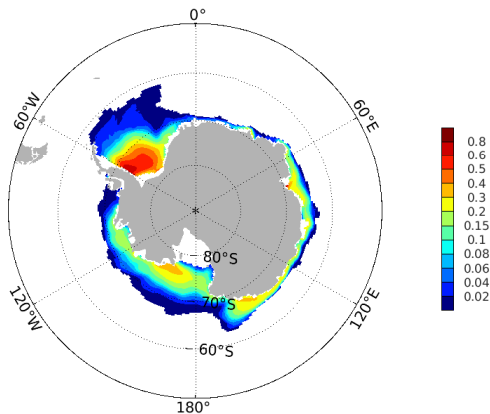

Figure : 1992-2019 March mean – snow thickness (m)



# Southern Hem. in March

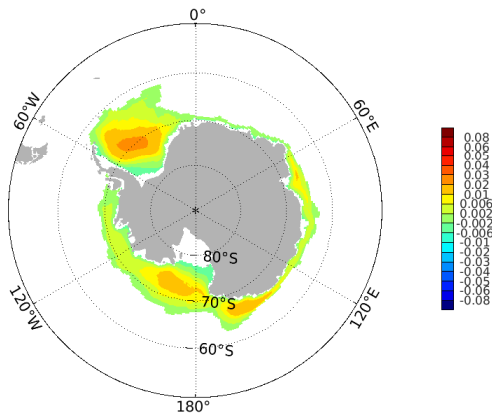

Figure : 1992-2019 March mean – ice+snow streamfunction (megaton/s)

# Southern Hem. in March

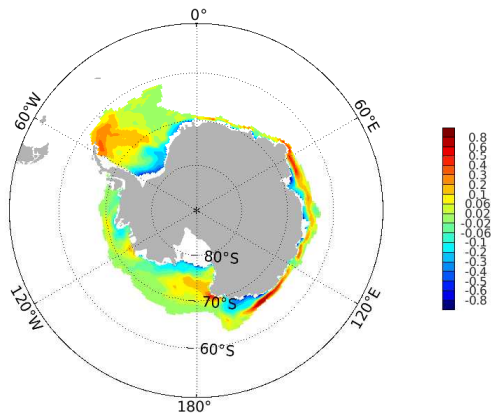

Figure : 1992-2019 March mean – ice+snow convergence (kiloton/s)

# Southern Hem. in September

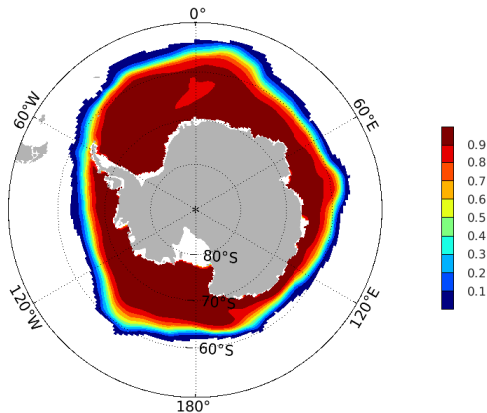

Figure : 1992-2019 September mean – ice concentration (unitless)

# Southern Hem. in September

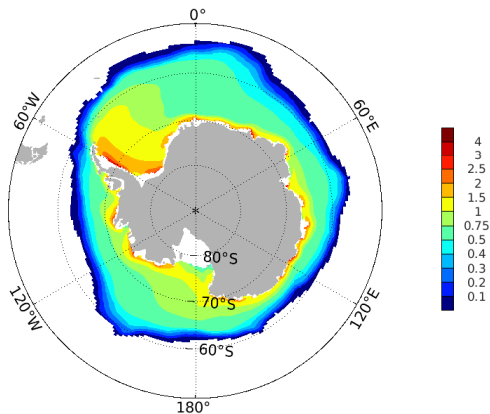

Figure : 1992-2019 September mean – ice thickness (m)

# Southern Hem. in September

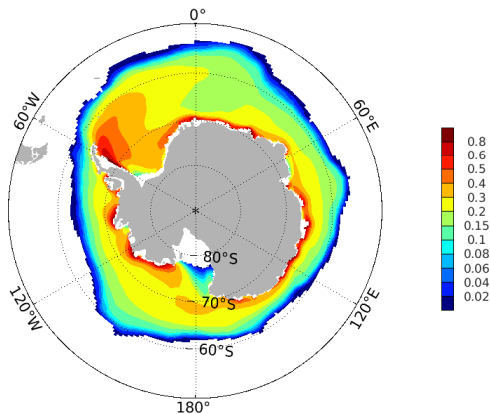

Figure : 1992-2019 September mean – snow thickness (m)

# Southern Hem. in September

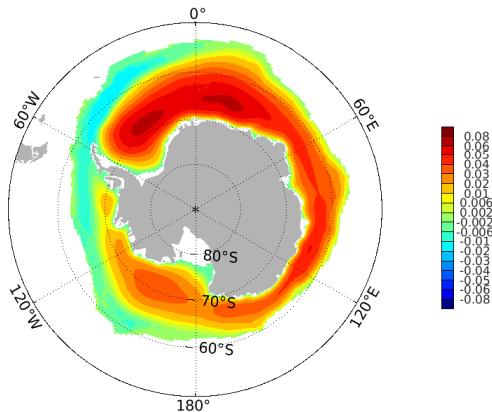

Figure : 1992-2019 September mean – ice+snow streamfunction (megaton/s)

# Southern Hem. in September

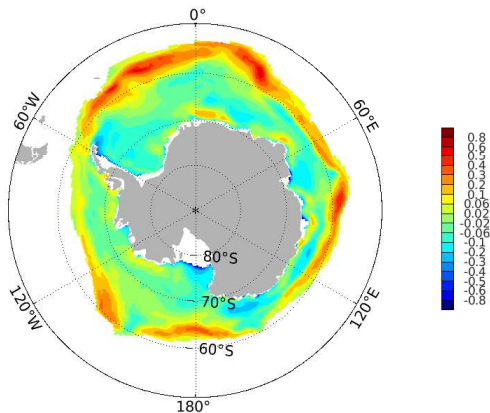

Figure : 1992-2019 September mean – ice+snow convergence (kiloton/s)
